# Supplementary material
Source: PubMed Central journal article supplement (PMC8049840)
Supplement: NIHMS1685078-supplement-Supplemental_Material.pdf [file NIHMS1685078-supplement-Supplemental_Material.pdf]

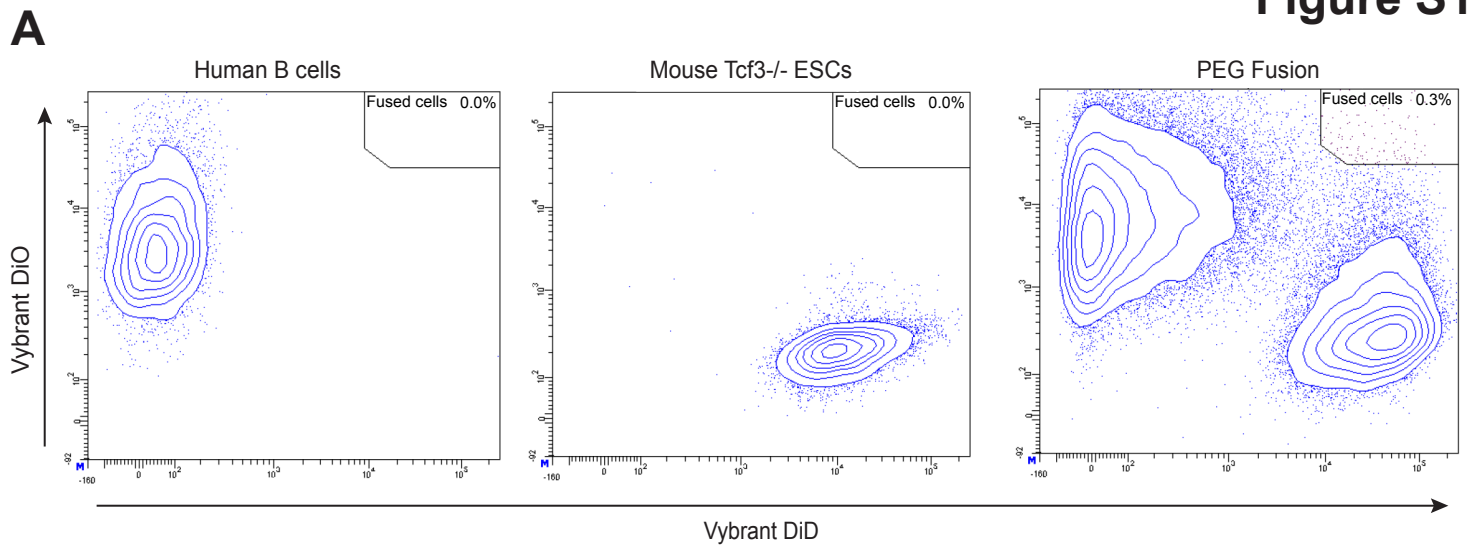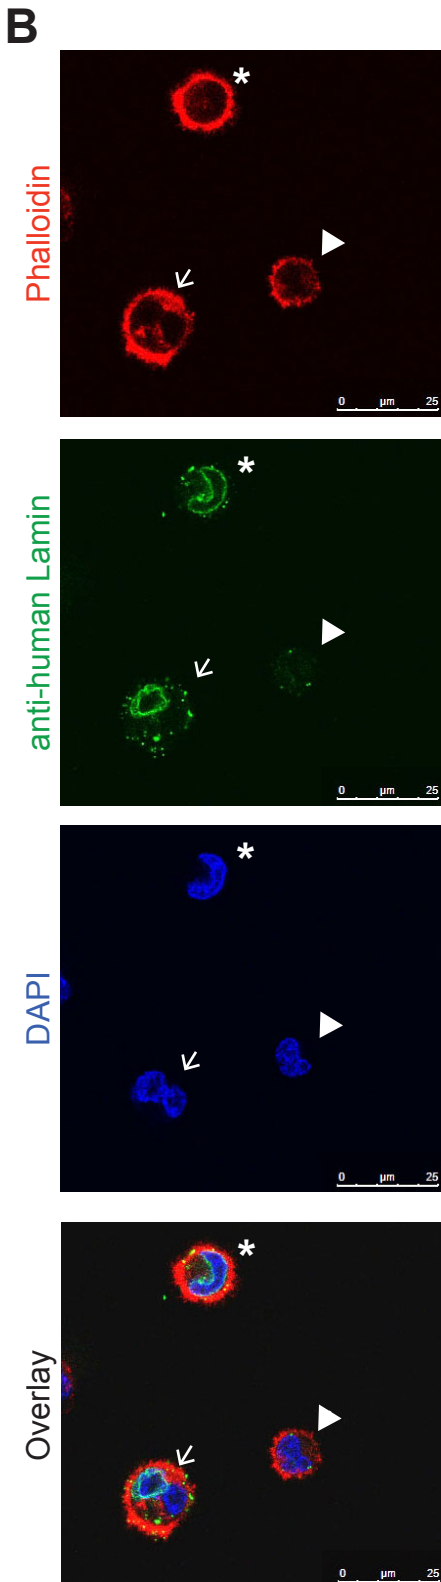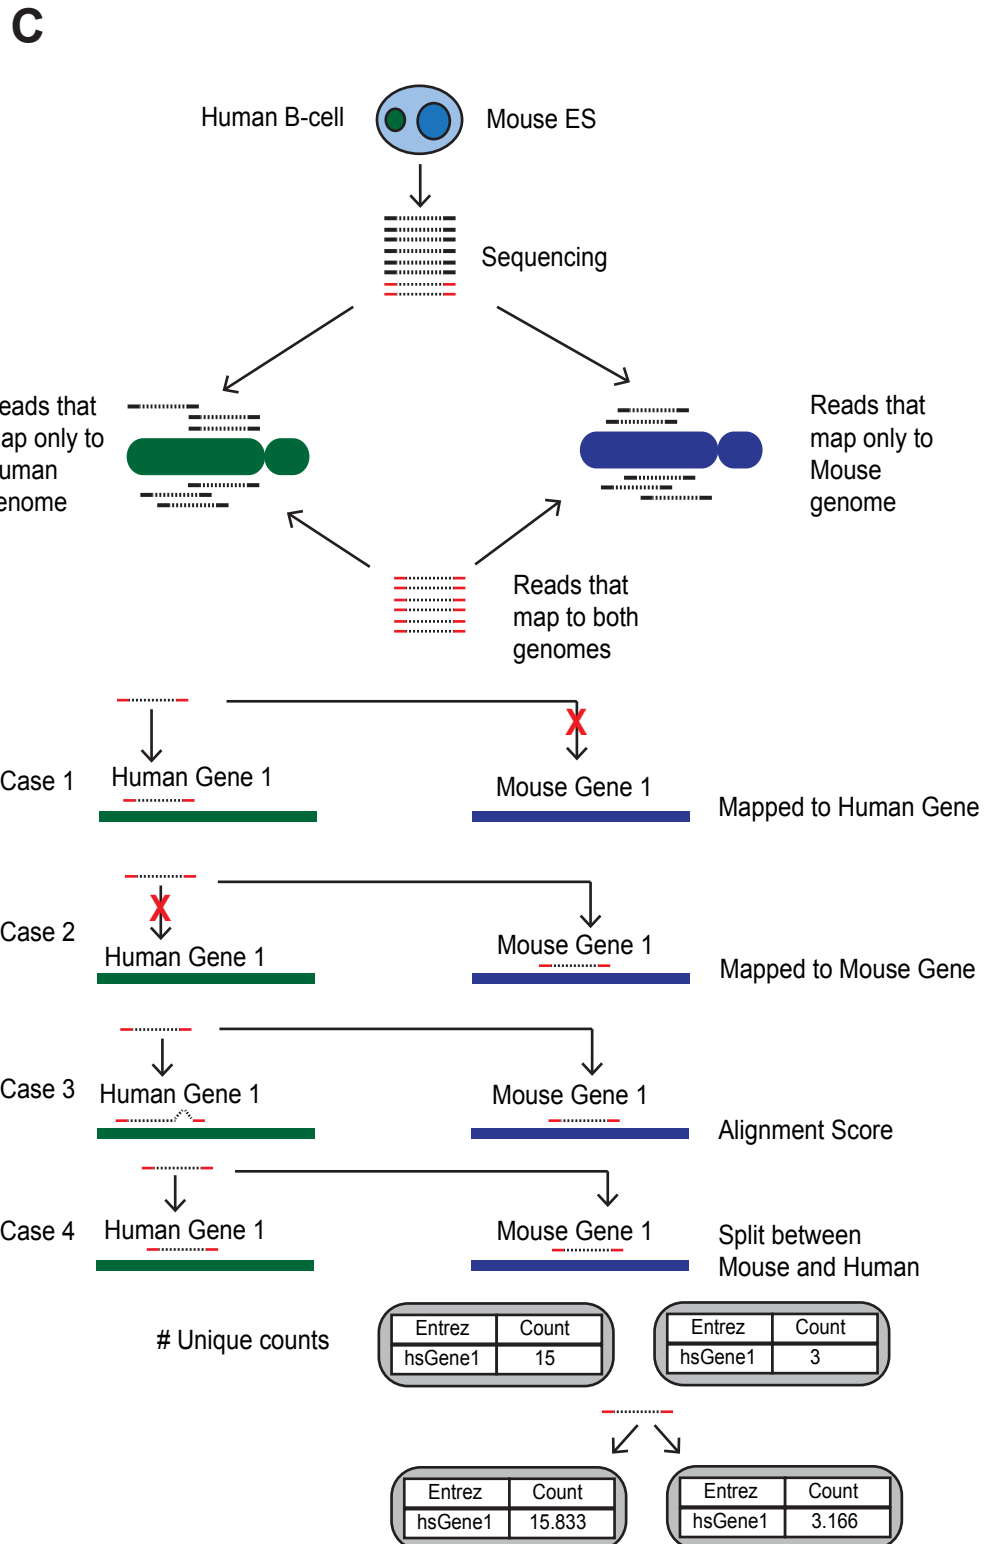

**Figure S1. mRNA sequence read mapping of bi-species heterokaryons sorted by flow cytometry. Related to Figure 1.**

(A) Human EBV-B cells labeled with Vybrant DiO and Mouse *Tcf7l1*<sup>-/-</sup> ESCs labeled with Vybrant DiD. Representative FACS plot of cells sorted 4 hours after PEG fusion. (B) Immunostaining of human EBV-B cells fused with mouse *Tcf7l1*<sup>-/-</sup> ESCs and sorted 4 hrs after fusion. One representative picture area was chosen to show unfused and hybrid cells. Phalloidin (in Red) stains the actin filaments. anti-human Lamin (in green) stains the EBV-B cell nuclear membrane. DAPI (in blue) stains the nucleus. The asterisk (\*) points to a human EBV-B cell, the triangle (∇) points to a mouse ESC and the arrow (←) points to a heterokaryon. Scale bar 0-25 um. (C) Schematic for the mapping of the mouse and human reads. First the reads were mapped to the mouse and human genomes with high stringency. Multi-mapping reads were assigned to either the mouse or human genome using known gene information. If a read mapped to a gene in one of the genomes, but non-gene region in the other, the reads were assigned to the appropriate gene. Next mapping quality was considered to assign the read to the genome with the higher quality mapping. Finally, the reads that mapped perfectly to genes in both genomes were split between each of the genomes by considering how many unique reads had been already mapped to each gene.



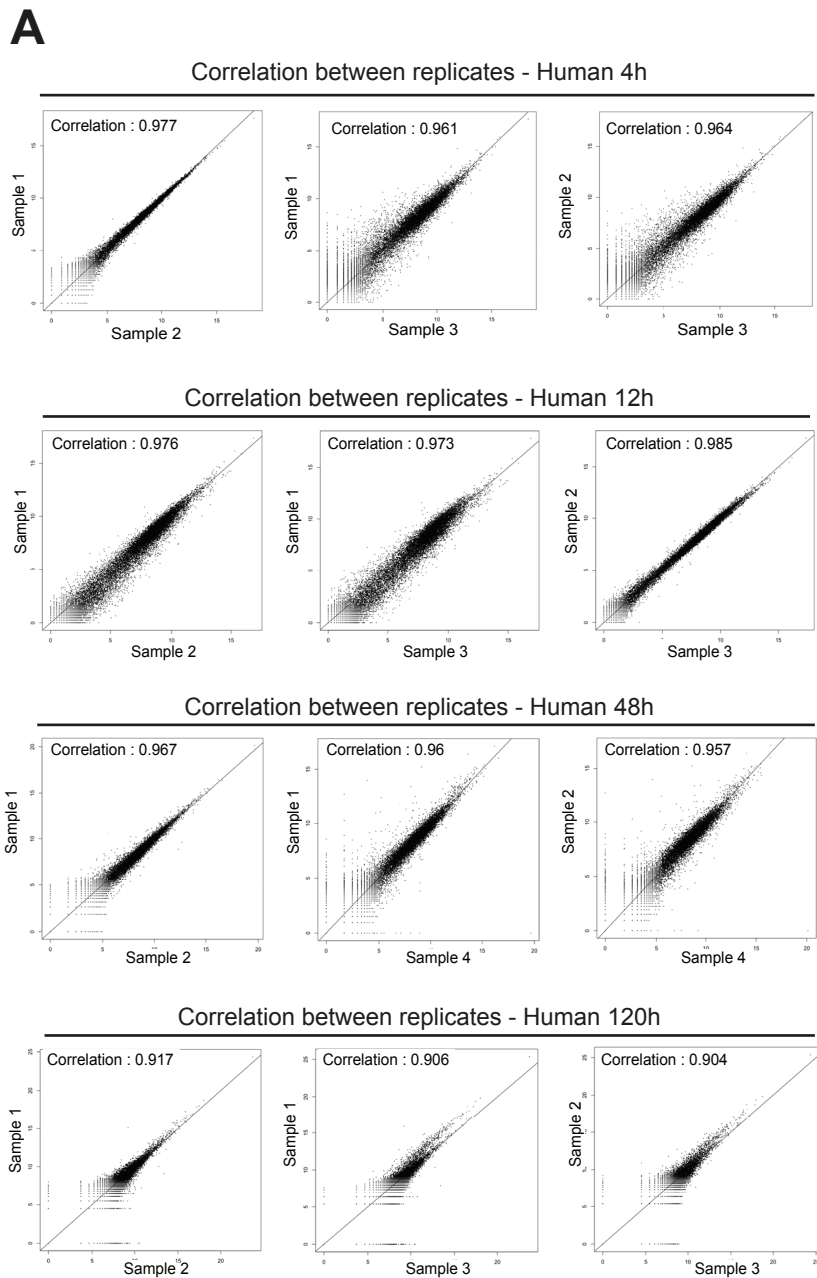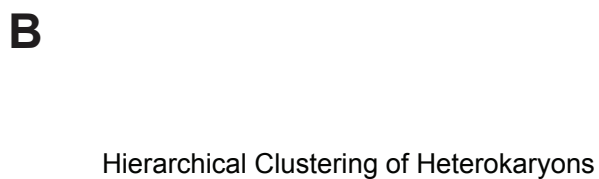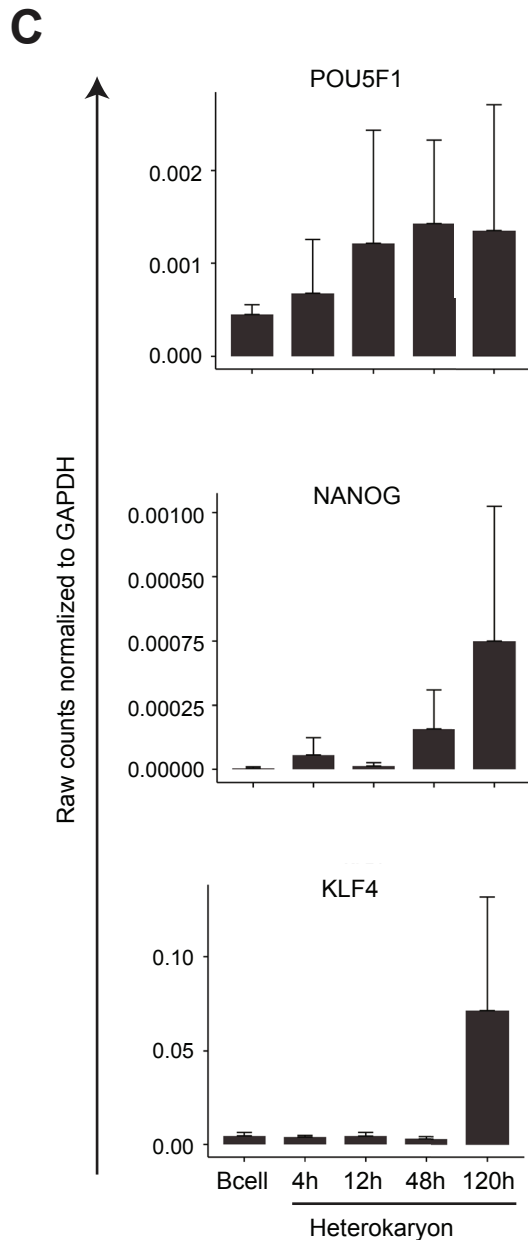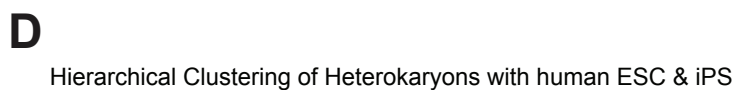

**Figure S2. Correlation of human gene expression in the heterokaryon sample replicates. Related to Figure 1.**

(A) Comparison of replicates for human gene expression during cell-fusion mediated reprogramming over 5 days. Spearman correlation between each sample is shown. Sample numbers are shown on the x and y axis, and the plots show the correlation shown for samples 4 hours after fusion, 12 hours after fusion, 48 hours after fusion and 120 hours after fusion. (B) Hierarchical clustering of heterokaryon samples show strong separation according to time-points. Results show that almost all the sample replicates separated according to their respective time-points after cell fusion. Plotting was performed using the complete agglomeration method using the expression values of the top-2000 genes with the highest variance across all the samples. (C) Expression of a representative set of human pluripotency markers in the heterokaryon samples during reprogramming. Results show the raw count of *POU5F1*, *NANOG*, and *KLF4* normalized to *GAPDH*, prior to fusion (B-cell) and 4h, 12h, 48h, and 120h, after cell fusion. (D) Hierarchical clustering was performed between heterokaryon samples, fibroblasts and iPSC samples from a reference dataset (GSE41716). Results show a strong separation between heterokaryon samples and both the fibroblast and iPSC samples, suggesting a significant difference in the gene expression patterns. Plotting was performed using the complete agglomeration method using the expression values of the top-2000 genes with the highest variance across all samples.

**Figure S3**

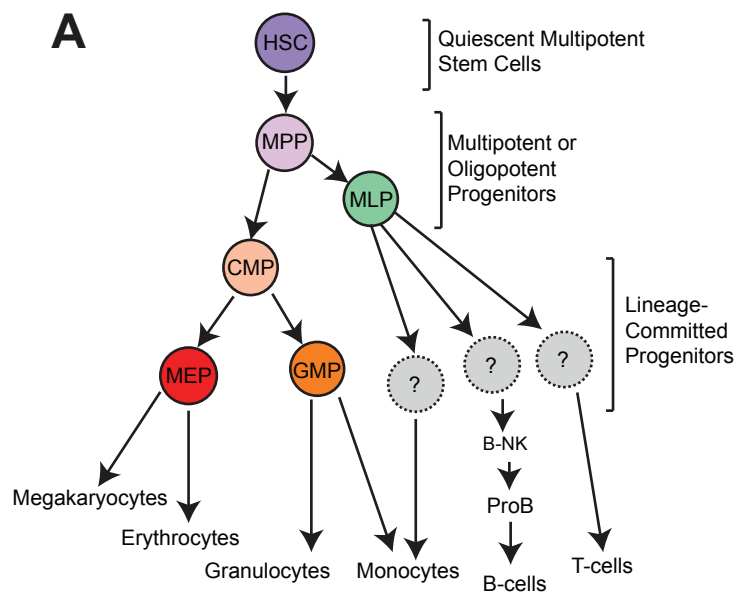

**B**

|     |                                      |                                    |
|-----|--------------------------------------|------------------------------------|
| HSC | Lin-CD34+CD38-CD45RA-CD90+CD49f+     | Hematopoietic Stem Cell            |
| MPP | Lin-CD34+CD38-CD45RA-CD90-CD49f-     | Multipotent Progenitor             |
| MLP | Lin-CD34+CD38-CD45RA+CD10+           | Multi-Lymphoid Progenitor          |
| CMP | Lin-CD34+CD38+CD10-CD7-CD45RA-CD135+ | Common Myeloid Progenitor          |
| MEP | Lin-CD34+CD38+CD10-CD7-CD45RA+CD135+ | Megakaryocyte Erythroid Progenitor |
| GMP | Lin-CD34+CD38+CD10-CD7-CD45RA-CD135- | Granulocyte Monocyte Progenitor    |

**C** Hierarchical Clustering of the human hematopoietic lineage dataset

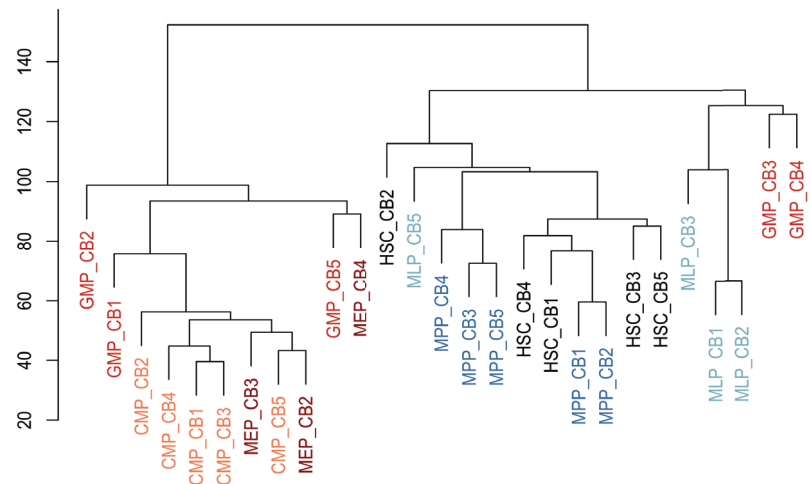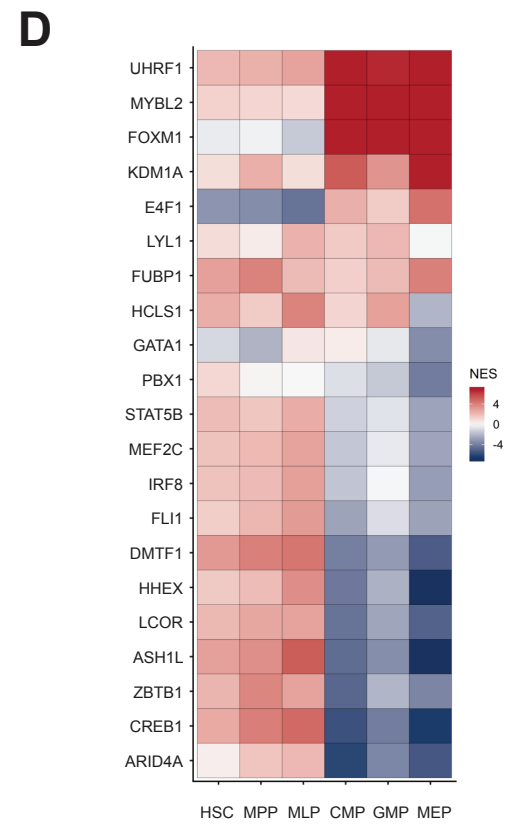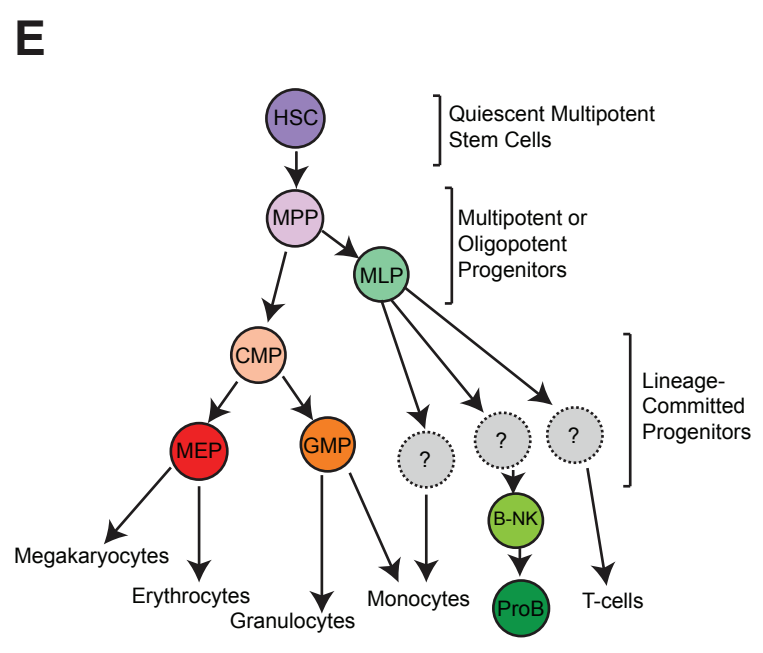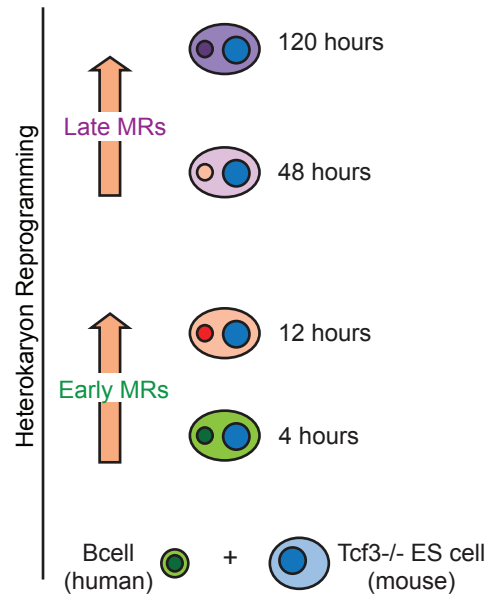

**Figure S3. A human hematopoietic reference dataset used to track the reprogramming of the human EBV-B nuclei in the heterokaryons. Related to Figure 3.**

(A) Hierarchical model of human hematopoietic system, adapted from (Doulatov et al., 2010; Laurenti et al., 2013). The samples consisted of a population of quiescent HSC, which are multi-potent stem cells that can differentiate into all blood cell types of the hematopoietic lineage (Doulatov et al., 2012). The HSCs after exiting quiescence form proliferating multipotent progenitor (MPP) cells that can differentiate into committed progenitors of the myeloid and the lymphoid lineages (Notta et al., 2011). In the lymphoid branch, the multi-lymphoid progenitors (MLP) can differentiate through as yet unknown intermediate progenitors into T lymphocytes and precursors of B lymphocytes and natural killer cell (B-NK) (Doulatov et al., 2010). MLPs are not entirely committed to the lymphoid lineage and can also differentiate into monocytes from the myeloid lineage (Doulatov et al., 2010). MLP population is highly similar to HSCs and MPPs (Laurenti et al., 2013), and can differentiate into the myeloid and lymphoid lineage, with a bias toward the lymphoid lineage. In the myeloid branch, the common myeloid progenitors (CMP) are committed to the myeloid lineage and can differentiate into the myeloid progenitors of granulocytes and monocytes (GMP), megakaryocytes and erythrocytes (MEP). (B) The table includes the surface markers that were used to sort the different hematopoietic fractions in the human hematopoietic dataset. (C) Hierarchical clustering of the hematopoietic lineage data set shows significant variations between cells of the same type. Plotting was performed using the complete agglomeration method, with the expression values of the top-2000 genes with the highest variance across all the samples. (D) VIPER-predicted activity of a representative set of human genes in the reference human hematopoietic stem and progenitor populations. Positive NES values indicating active MRs are shown in red, and negative NES values indicating silenced MRs are shown in blue. (E) Model of heterokaryon reprogramming, shown alongside hierarchical model of hematopoietic development, adapted from (Doulatov et al., 2010; Laurenti et al., 2013).

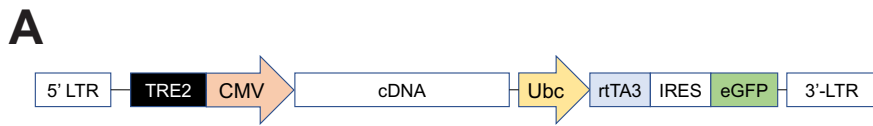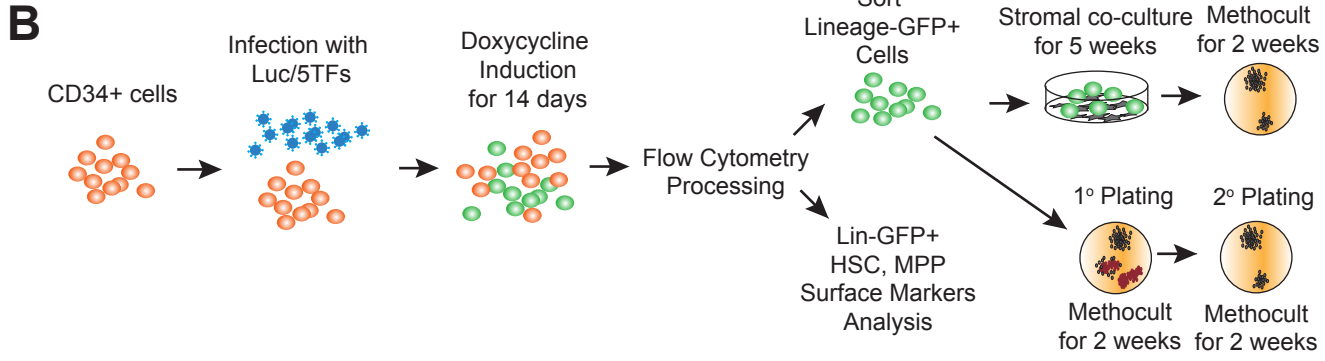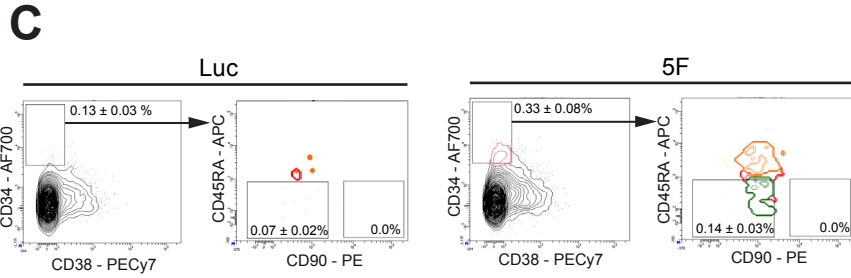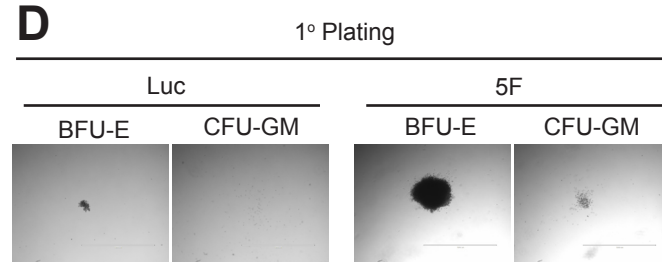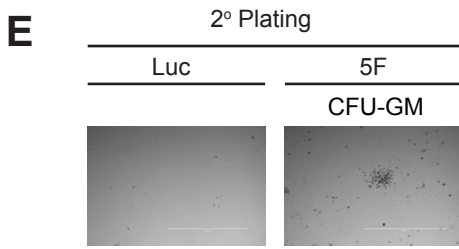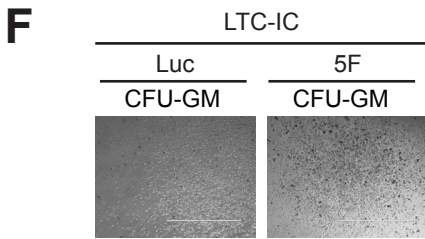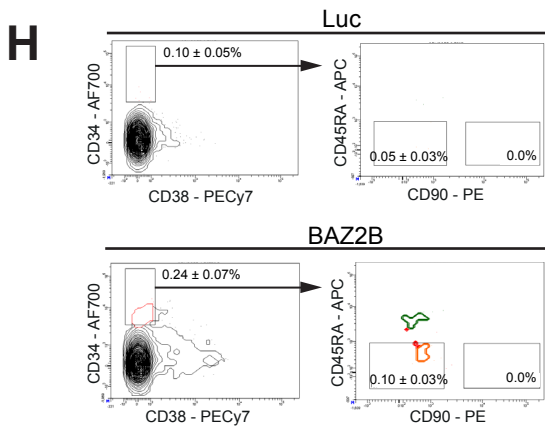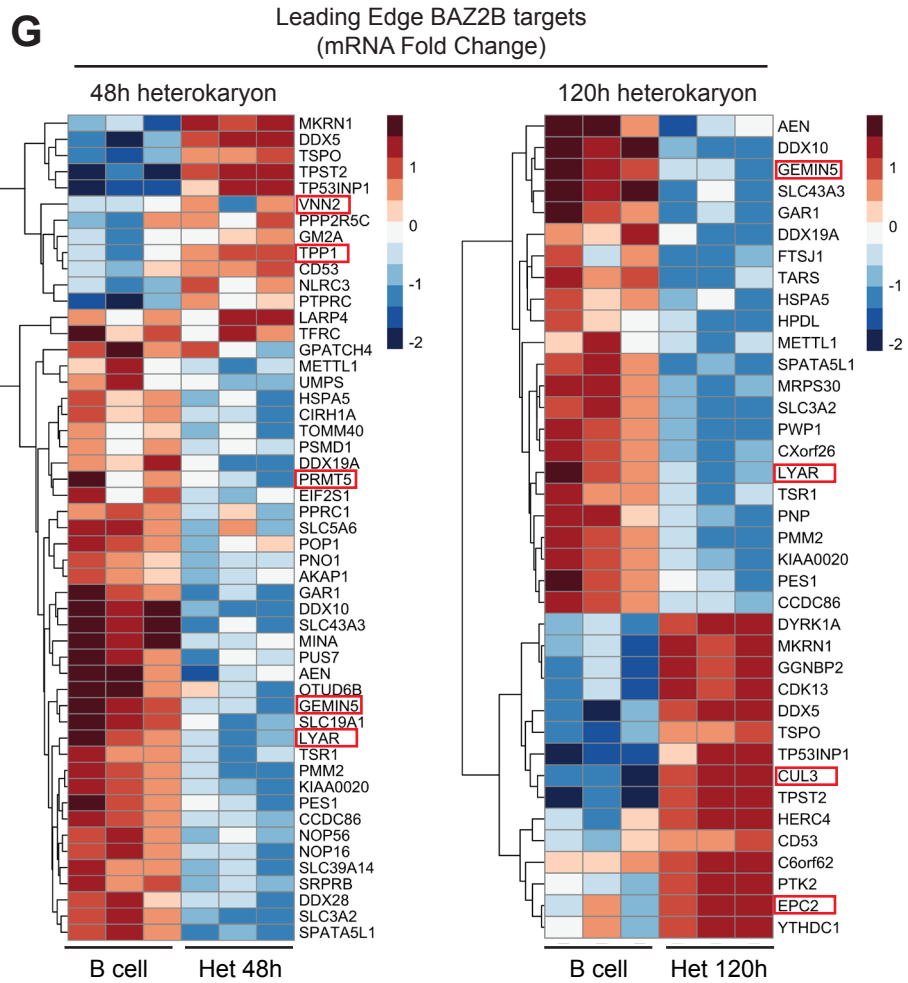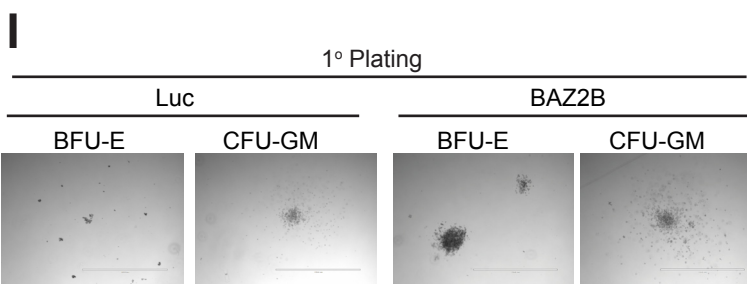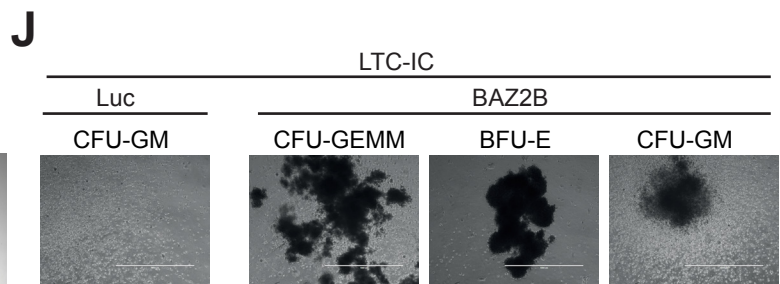

**Figure S4. Overexpression of the combination of 5 transcription factors or of *BAZ2B* shows enhanced stemness and clonogenicity of CD34+ hematopoietic progenitors. Related to Figure 4.**

(A) Map of the inducible lentiviral vector used for cloning all the cDNAs. (B) Schematic showing the experimental workflow of the transduction of CD34+ hematopoietic stem and progenitor cells with Luciferase or 5-MR cocktail or *BAZ2B*. (C-F) CD34+ cells transduced with Luciferase or 5MR. (C) Representative FACS plots on day 14 for Lin-GFP+CD34+CD38-CD45RA-CD90- MPPs and Lin-GFP+CD34+CD38-CD45RA-CD90+ HSCs. Percentage fractions for each gate normalized to Lineage-GFP+ fraction represented as mean  $\pm$  SD from N = 5 donors (D) Representative colony images of BFU-E and CFU-GM from the primary Methocult plating. Scale bar 0-1000um. (E) Representative colony images of CFU-GM from the secondary Methocult plating. Scale bar 0-1000um. (F) Representative colony images of CFU-GM from the Methocult colonies of the LTC-IC assay. Scale bar 0-1000um. (G) mRNA fold change of the GSEA leading edge targets of *BAZ2B* in the heterokaryons at 48 hours and 120 hours after fusion. Differential expression was calculated using EdgeR, and shown genes are in the leading edge and have an FDR adjusted pvalue < 0.01. Boxed genes are relevant key factors discussed in the text. (H-J) CD34+ cells transduced with Luciferase or *BAZ2B* (H) Representative FACS plots on day 14 for Lin-GFP+CD34+CD38-CD45RA-CD90- MPPs and Lin-GFP+CD34+CD38-CD45RA-CD90+ HSCs. Percentage fractions for each gate normalized to Lineage-GFP+ fraction represented as mean  $\pm$  SD from N = 5 donors (I) Representative colony images of BFU-E and CFU-GM from the primary methocult plating. Scale bar 0-1000um. (J) Representative colony images of BFU-E, CFU-GM and CFU-GEMM from the LTC-IC assay. Scale bar 0-1000um.

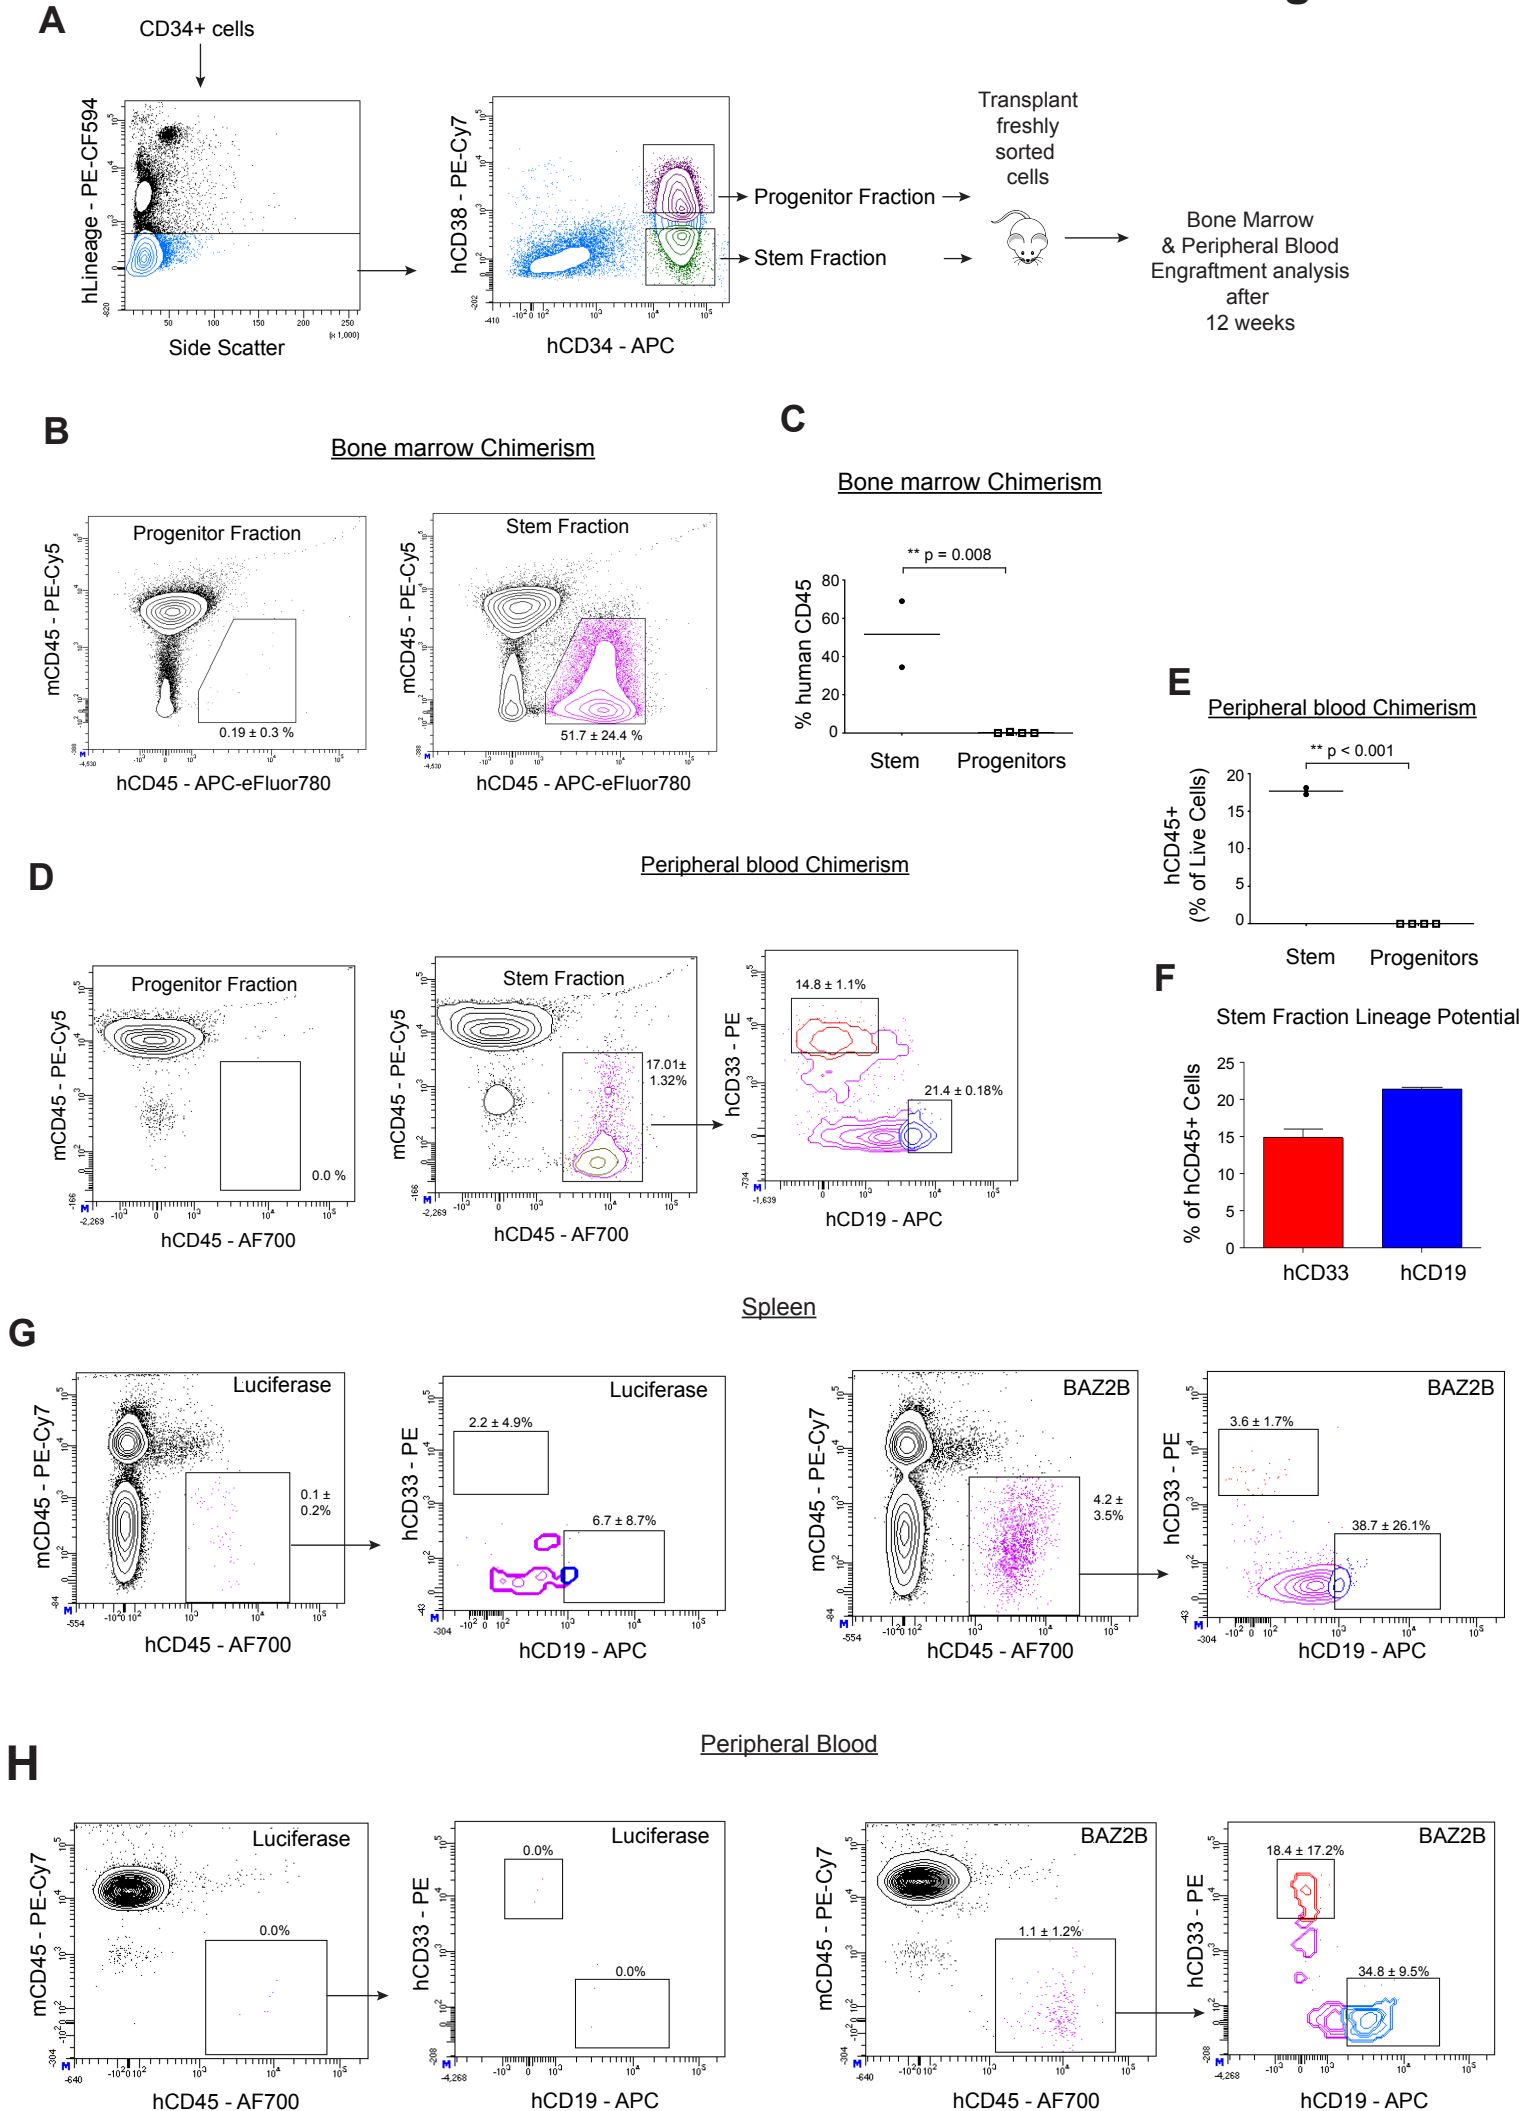

**Figure S5. Long-term engraftment potential of uncultured stem and progenitor fractions. Related to Figure 5 and 6.**

(A) Lin-CD34<sup>+</sup>CD38<sup>-</sup> stem fraction and the Lin-CD34<sup>+</sup>CD38<sup>+</sup> progenitor fraction were freshly sorted and transplanted intra-femorally in NSG mice. Human hematopoietic engraftment was analysed after 12 weeks. (B) Representative FACS plot for bone marrow engraftment of human CD45<sup>+</sup> hematopoietic cells. Percentage fractions for hCD45 gate normalized to live cells represented as mean  $\pm$  SD. N = 1 donor, 2 mice for stem fraction, 4 mice for progenitor fraction. (C) Quantification of the percentage of human CD45<sup>+</sup> cells in the bone marrow of all transplanted mice. Two tailed unpaired t-test \*\*p<0.01, \*p<0.05. (D) Representative FACS plots showing human CD45 chimerism in the peripheral blood. Percentage fractions for hCD45 gate normalized to live cells represented as mean  $\pm$  SD. CD33<sup>+</sup> myeloid and CD19<sup>+</sup> lymphoid gates show the lineage potential for the human CD45<sup>+</sup> cells. Percentage fractions for hCD33/hCD19 gate normalized to hCD45<sup>+</sup> cells represented as mean  $\pm$  SD. N = 1 donor, 2 mice for stem fraction, 4 mice for progenitor fraction. (E) Quantification of the peripheral blood chimerism based on the fraction of human CD45<sup>+</sup> cells within the live cells. Two tailed unpaired t-test \*\*p<0.01, \*p<0.05. (F) lineage potential with respect to the total engrafted human CD45<sup>+</sup> cells in the mice transplanted with the Lin-CD34<sup>+</sup>CD38<sup>-</sup> stem fraction. (G-H) Representative FACS plots showing human chimerism for Luciferase or *BAZ2B* transduced cells indicating the CD33-myeloid and CD19-lymphoid potential. Human CD45 population normalized to live cells represented as mean  $\pm$  SD. CD33<sup>+</sup> myeloid and CD19<sup>+</sup> lymphoid gates show the lineage potential for the human CD45<sup>+</sup> cells. Human CD33/CD19 populations normalized to human CD45<sup>+</sup> cells is represented as mean  $\pm$  SD. N = 4 donors, 2-3 mice per donor. (G) Spleen and (H) Peripheral blood.



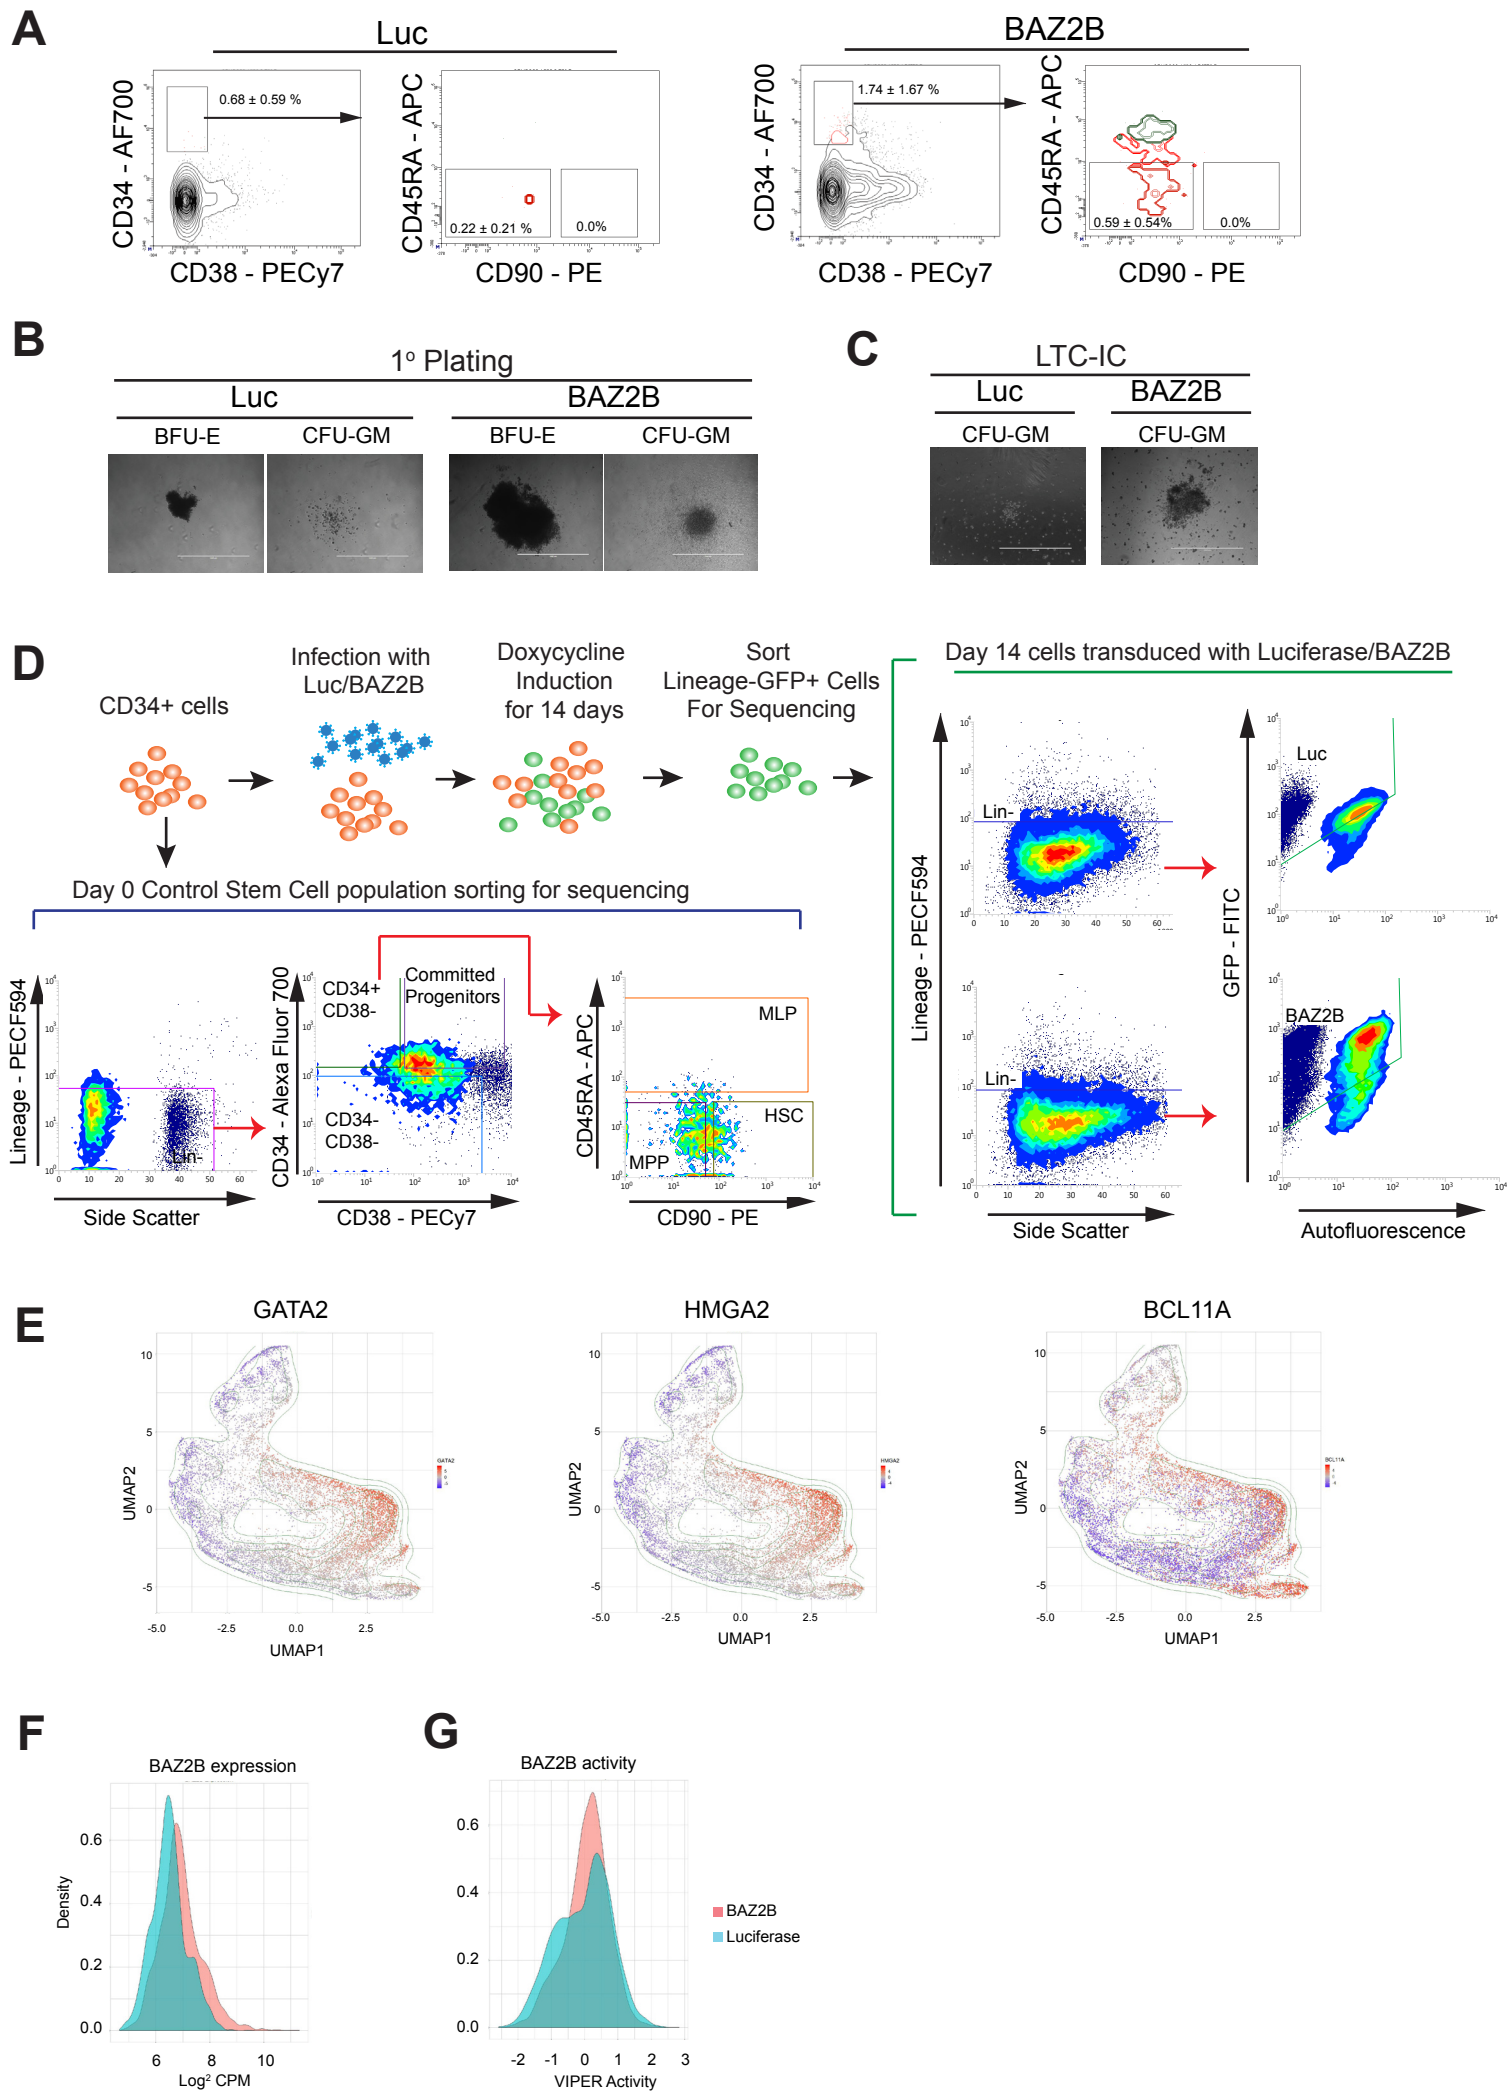

**Figure S6. *BAZ2B*-induced reprogramming of committed progenitors to multipotent hematopoietic progenitors. Related to figure 6.**

(A) Representative FACS plot on day 14 showing the progenitor Lin-GFP+CD34+CD38-, MPP Lin-GFP+CD34+CD38-CD45RA-CD90- and HSC Lin-GFP+CD34+CD38-CD45RA-CD90+. Percentage fractions for each gate normalized to Lineage-GFP+ fraction represented as mean  $\pm$  SD from N = 4 donors. (B) Representative colony images of BFU-E and CFU-GM from the primary Methocult plating. Scale bar 0-1000um. (C) Representative colony images of BFU-E, CFU-GEMM and CFU-GM from the LTC-IC methocult plating. Scale bar 0-1000um. (D) Top-left panel - Experimental schematic of the single-cell sequencing experiment. Bottom-Left Panel - FACS plots showing control cell populations sorted on day 0 for sequencing: HSC (Lin-CD34+CD38-CD45RA-CD90+), MPP (Lin-CD34+CD38-CD45RA-CD90-), MLP (Lin-CD34+CD38-CD45RA+) enriched population, and Lineage committed Progenitors (Lin-CD34+CD38+). Right panel - FACS plots showing the CD34+ cells transduced with Luciferase and *BAZ2B* for 14 days. Lineage-GFP+ cells were sorted for single-cell sequencing. (E) UMAP plot showing VIPER activity of transcription factor markers in reference single-cell populations, including HSCs, MPPs, MLPs, and Lineage committed progenitors. (F,G) Lineage-committed progenitors transduced with Luciferase/*BAZ2B*. (F) mRNA expression of *BAZ2B* (G) VIPER-predicted activity of *BAZ2B*.

**Figure S7**

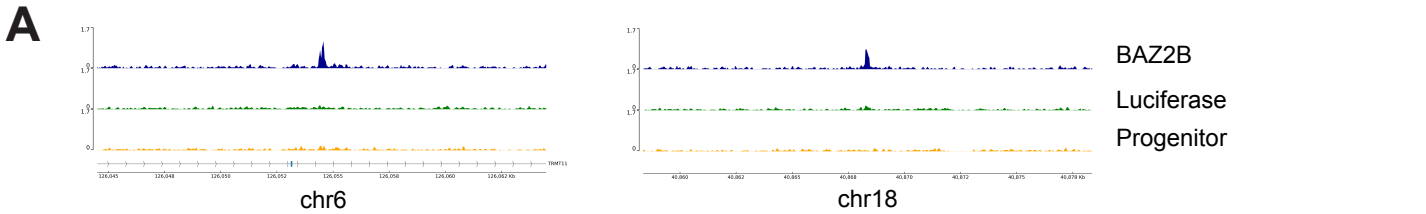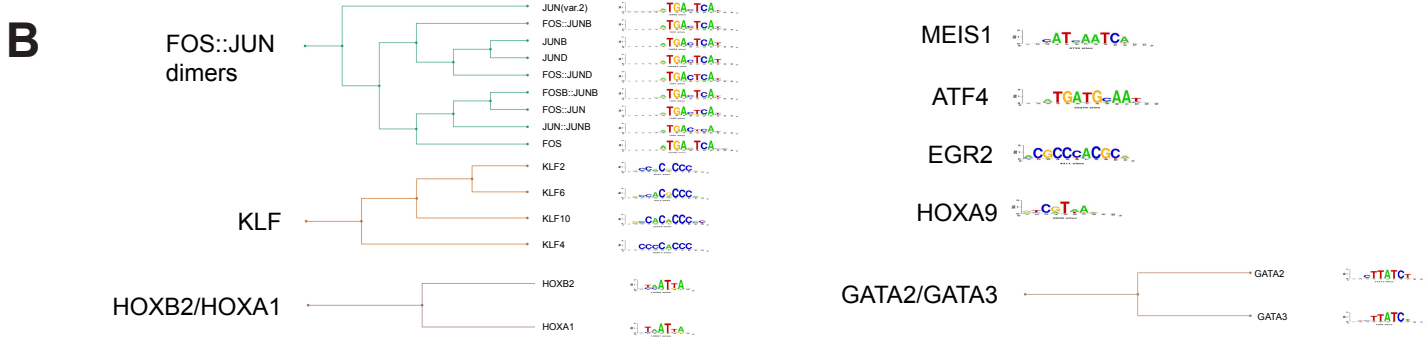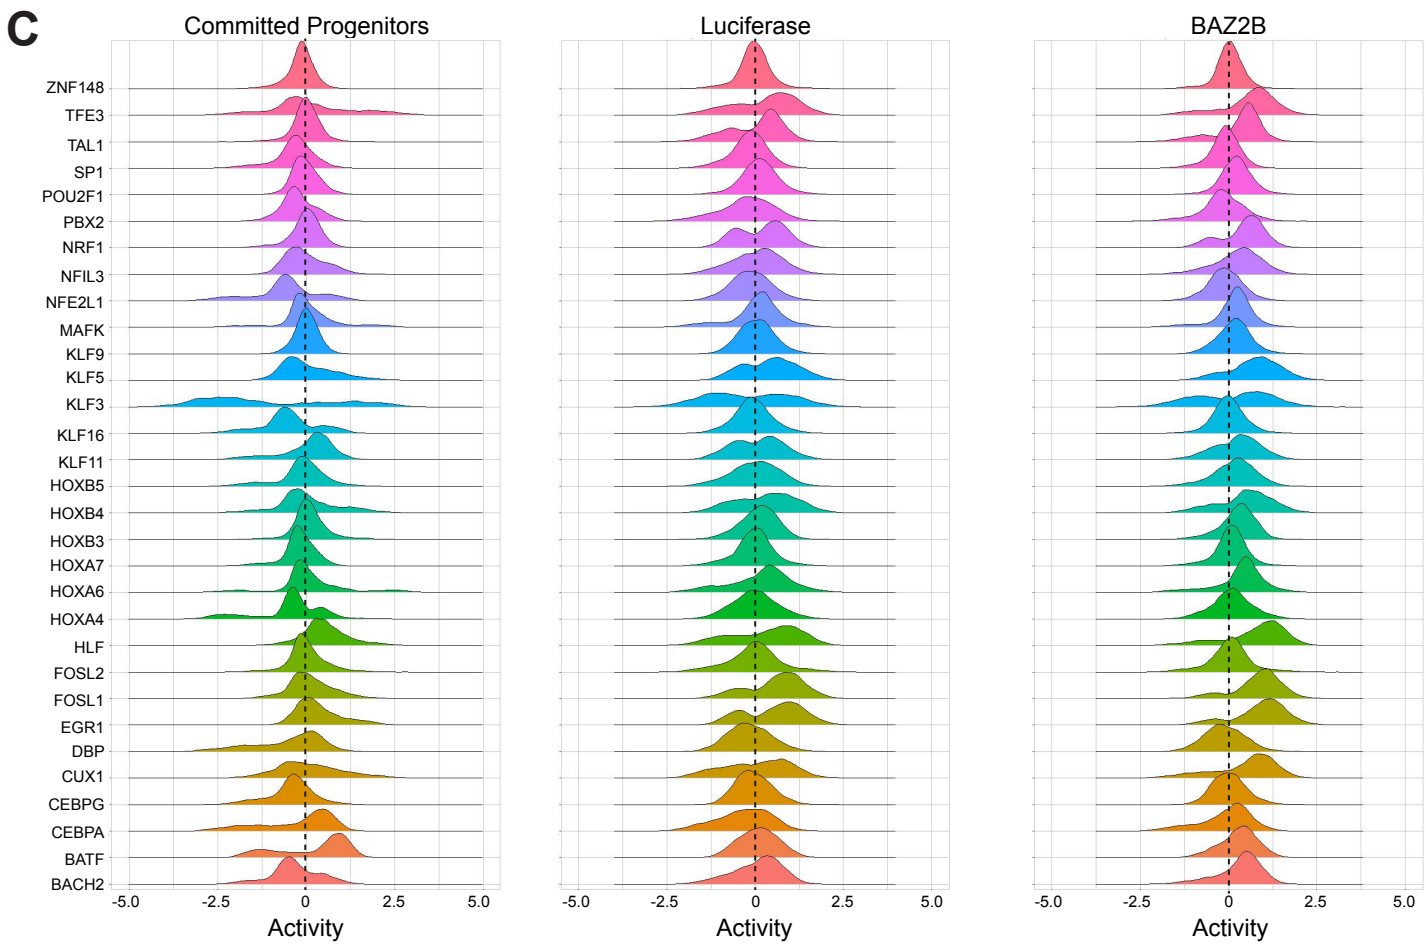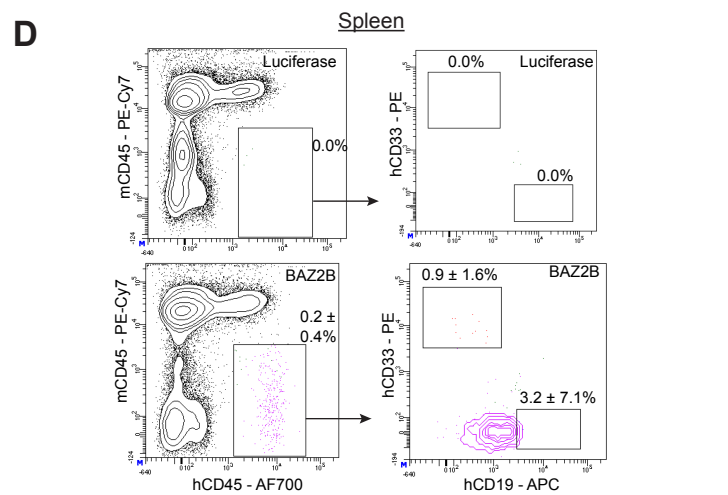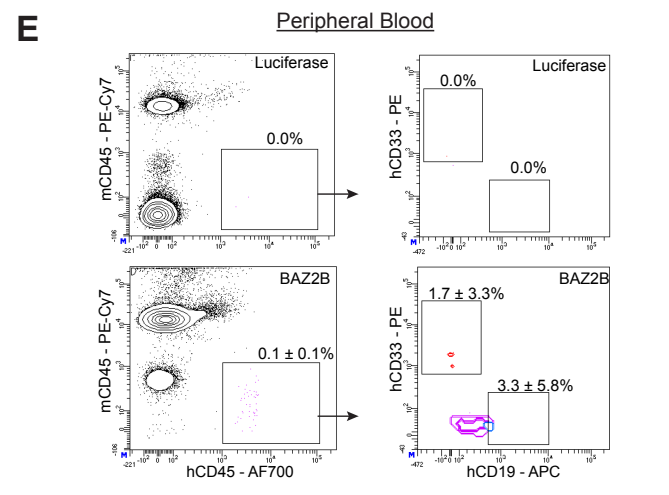

**Figure S7. *BAZ2B*-induced chromatin accessibility and lineage potential of long-term engrafted cells during reprogramming of committed progenitors to multipotent hematopoietic progenitors. Related to Figure 6 and 7.**

(A) Representative ATAC-Seq peaks unique to *BAZ2B*-transduced progenitors compared to Luciferase-transduced or untransduced committed progenitors. (B) Motif clustering by RSAT for consensus motifs of 17 MRs sub-grouped into 9 TF families with enriched motif-binding sites in *BAZ2B*-induced nucleosome-free regions and VIPER protein activity > 1.0. (C) Ridgeline density plots showing the VIPER protein activity of 31 MRs with < 1.0 activity score. (D-E) Lin-CD34<sup>+</sup>CD38<sup>-</sup> stem fraction and the Lin-CD34<sup>+</sup>CD38<sup>+</sup> progenitor fraction were freshly sorted and transplanted intra-femorally in NSG mice. Human hematopoietic engraftment was analysed after 12 weeks. Representative FACS plots showing engrafted human CD45<sup>+</sup> cells in NSG mice indicating the CD33-myeloid and CD19-lymphoid potential. Human CD45 population normalized to live cells represented as mean ± SD. Human CD33/CD19 populations normalized to hCD45<sup>+</sup> population represented as mean ± SD. N = 3 donors with 2-3 mice per donor. (D) Spleen and (E) Peripheral blood.

**Table S1.** For each sample, the table shows the total number of mapped reads, the number of reads that mapped uniquely to the human and mouse genomes, multi-mapping reads that mapped to both genomes, reads that mapped to either the human (hg19) or mouse (mm10) genomes after multi-mapping reads were assigned to either the mouse or human genome using the “fair-split” method, number of human/mouse genes based on the mapped reads after "fair-split" correction. *Related to Figure 1.*

|         | Total Reads | Human (Unique) | Mouse (Unique) | Multi-mapping | Human (Post fair-split) | Mouse (Post fair-split) | Human Genes > 0 reads | Human Genes > 1 read | Human Genes > 5 reads | Mouse Genes > 0 reads | Mouse Genes > 1 read | Mouse Genes > 5 reads |
|---------|-------------|----------------|----------------|---------------|-------------------------|-------------------------|-----------------------|----------------------|-----------------------|-----------------------|----------------------|-----------------------|
| Bcell   | 28,273,008  | 27,680,415     | 1,765          | 590,828       | 28,271,243              | 1,765                   | 17,029                | 16,082               | 14,418                | 134                   | 71                   | 34                    |
| Bcell   | 23,071,287  | 22,450,851     | 1,402          | 619,034       | 23,069,885              | 1,402                   | 17,025                | 15,975               | 14,338                | 139                   | 70                   | 35                    |
| Bcell   | 25,572,699  | 25,020,566     | 1,461          | 550,672       | 25,571,238              | 1,461                   | 17,057                | 16,048               | 14,443                | 126                   | 68                   | 30                    |
| Het4h   | 26,385,518  | 8,357,365      | 17,498,299     | 529,854       | 8,670,944               | 17,714,574              | 15,071                | 14,054               | 12,474                | 17,730                | 16,998               | 15,608                |
| Het4h   | 33,172,158  | 9,984,775      | 22,655,854     | 531,529       | 10,296,287              | 22,875,871              | 15,281                | 14,362               | 12,827                | 17,882                | 17,236               | 15,895                |
| Het4h   | 83,758,127  | 41,070,282     | 41,062,055     | 1,625,790     | 41,925,026              | 41,833,101              | 17,188                | 16,435               | 15,020                | 17,612                | 16,937               | 15,625                |
| Het12h  | 71,139,709  | 32,242,448     | 37,825,136     | 1,072,125     | 32,842,567              | 38,297,142              | 17,214                | 16,561               | 15,084                | 17,708                | 17,154               | 15,887                |
| Het12h  | 75,805,230  | 37,458,398     | 36,854,827     | 1,492,005     | 38,254,324              | 37,550,906              | 16,215                | 15,473               | 14,064                | 17,282                | 16,667               | 15,404                |
| Het12h  | 78,824,375  | 39,022,278     | 38,117,926     | 1,684,171     | 39,931,191              | 38,893,184              | 16,456                | 15,653               | 14,239                | 17,388                | 16,776               | 15,448                |
| Het48h  | 51,280,183  | 3,271,949      | 47,294,808     | 713,426       | 3,674,748               | 47,605,435              | 14,138                | 13,054               | 11,518                | 17,600                | 16,866               | 15,618                |
| Het48h  | 51,742,113  | 3,034,489      | 47,850,548     | 857,076       | 3,495,871               | 48,246,242              | 14,192                | 13,072               | 11,451                | 17,763                | 17,132               | 15,993                |
| Het48h  | 48,586,528  | 8,151,493      | 39,044,433     | 1,390,602     | 8,858,769               | 39,727,759              | 15,884                | 14,814               | 12,977                | 18,167                | 17,442               | 16,196                |
| Het120h | 63,139,366  | 1,115,469      | 60,562,409     | 1,461,488     | 1,897,669               | 61,241,697              | 13,410                | 12,028               | 9,817                 | 18,247                | 17,605               | 16,492                |
| Het120h | 53,906,586  | 798,759        | 51,915,397     | 1,192,430     | 1,506,793               | 52,399,793              | 11,921                | 10,741               | 8,317                 | 18,184                | 17,711               | 16,494                |
| Het120h | 67,176,421  | 754,427        | 65,038,187     | 1,383,807     | 1,488,917               | 65,687,504              | 11,211                | 9,536                | 6,359                 | 18,296                | 17,682               | 16,567                |

**Table S2.** 105 TFs that were significantly associated (P-val < 0.05) with Principal Component 1 of SVD analysis. *Related to Figure 2.*

| <b>Name</b> | <b>Het4h</b> | <b>Het12h</b> | <b>Het48h</b> | <b>Het120h</b> |
|-------------|--------------|---------------|---------------|----------------|
| AATF        | 4.543        | 1.518         | -2.372        | -1.320         |
| ARHGAP35    | 2.172        | 2.575         | 1.013         | 1.570          |
| ASH2L       | 1.805        | 3.364         | 2.638         | 2.154          |
| ATAD2       | 4.171        | 6.900         | 2.323         | 2.134          |
| BUD31       | 4.872        | 5.853         | 1.518         | -1.323         |
| CARHSP1     | 3.324        | 4.407         | 6.150         | 2.710          |
| CBX2        | 4.972        | 4.176         | 1.070         | 0.305          |
| CCRN4L      | 3.885        | 3.627         | -1.524        | -2.300         |
| CHAMP1      | 2.708        | 3.371         | 0.966         | 0.815          |
| CREB3       | 2.299        | 2.437         | 2.537         | 0.031          |
| CREM        | 1.123        | 3.672         | -1.452        | -2.367         |
| DMAP1       | 2.799        | 2.849         | 1.741         | -0.550         |
| E2F1        | 5.530        | 4.551         | 1.604         | -0.545         |
| E2F2        | 6.573        | 6.011         | 2.385         | 1.818          |
| E2F6        | 2.763        | 3.417         | -5.651        | -4.576         |
| E2F7        | 7.408        | 8.296         | 5.779         | 2.270          |
| E2F8        | 8.996        | 10.467        | 6.720         | 4.615          |
| ECSIT       | 5.210        | 3.108         | 1.368         | -1.422         |
| ENO1        | 4.656        | 2.521         | 0.072         | 0.354          |
| FOXM1       | 10.100       | 8.889         | 5.362         | 2.396          |
| FUBP1       | 4.084        | 4.318         | 1.374         | 3.333          |
| GABPB1      | 2.542        | 4.371         | -2.339        | -2.235         |
| GTF2H4      | 4.341        | 3.410         | 2.516         | 0.312          |
| GTF2IRD1    | 3.562        | 3.600         | 0.011         | 1.606          |
| GZF1        | 1.104        | 4.556         | -0.266        | -0.158         |
| HDAC1       | 1.816        | 1.956         | 4.663         | 3.900          |
| HDGF        | 5.749        | 5.919         | 0.481         | 0.368          |
| HLTF        | 3.882        | 6.754         | 4.518         | 3.706          |
| HMGA1       | 5.444        | 2.161         | 2.314         | 0.207          |
| HMGB1       | 2.907        | 5.386         | 3.323         | 3.378          |
| HMGB2       | 6.350        | 8.586         | 5.777         | 4.188          |
| HMGN5       | 2.850        | 4.127         | 1.600         | -0.007         |
| HNRNPAB     | 8.661        | 8.957         | 2.849         | 2.259          |
| HSF2        | 1.512        | 3.356         | -1.888        | -0.530         |
| IKZF5       | 2.913        | 3.714         | -2.045        | 0.500          |
| ILF2        | 5.922        | 5.817         | -0.782        | -0.813         |
| ILF3        | 5.285        | 2.222         | -1.339        | 0.691          |
| KDM1A       | 5.808        | 3.711         | 2.958         | 2.299          |

|         |       |        |        |        |
|---------|-------|--------|--------|--------|
| MAZ     | 6.143 | 1.368  | 0.058  | -0.150 |
| MNX1    | 2.082 | 2.890  | 1.703  | 1.037  |
| MRPL28  | 8.491 | 7.121  | 3.800  | 0.993  |
| MRRF    | 3.248 | 3.290  | -4.592 | -4.436 |
| MTA2    | 4.257 | 3.924  | -0.785 | -0.291 |
| MXD3    | 2.041 | 2.545  | 3.225  | 2.004  |
| MYBL2   | 8.945 | 8.727  | 6.145  | 3.542  |
| NAT14   | 4.136 | 2.389  | 2.491  | -0.073 |
| NFYA    | 2.557 | 1.687  | 0.165  | 1.012  |
| NR2F6   | 6.098 | 5.415  | 0.910  | 2.198  |
| PA2G4   | 5.216 | 3.137  | -4.946 | -5.014 |
| PHF5A   | 3.685 | 4.654  | 0.761  | -0.201 |
| PITX1   | 6.277 | 4.879  | -0.461 | -0.559 |
| PLAGL2  | 4.208 | 2.498  | -2.272 | -2.731 |
| PREB    | 3.970 | 4.164  | 1.290  | -0.158 |
| PRKDC   | 6.401 | 6.080  | 1.973  | 4.338  |
| PSMC3IP | 5.789 | 7.087  | 0.451  | 0.063  |
| PTTG1   | 8.772 | 10.245 | 8.582  | 4.624  |
| PURB    | 3.587 | 5.602  | -0.988 | -2.163 |
| RFXANK  | 6.241 | 7.156  | 3.805  | 0.354  |
| RFXAP   | 2.581 | 3.701  | 1.413  | 1.770  |
| SARNP   | 5.199 | 7.567  | 5.038  | 1.473  |
| SCMH1   | 6.303 | 3.742  | 3.047  | 3.084  |
| SMARCA4 | 4.092 | 1.527  | 1.458  | 1.221  |
| TADA2A  | 2.930 | 2.637  | -1.924 | -1.838 |
| TAF12   | 1.608 | 4.715  | 3.383  | 1.100  |
| TAF1B   | 3.813 | 5.687  | -0.455 | -0.813 |
| TAF5    | 4.787 | 6.774  | 0.146  | -0.914 |
| TAF9    | 4.098 | 7.709  | 0.480  | -0.473 |
| TAF9B   | 1.886 | 3.234  | 0.295  | 0.821  |
| TCF19   | 5.102 | 5.239  | 4.705  | 2.881  |
| TCF3    | 3.128 | 1.439  | 2.462  | 1.211  |
| TFAM    | 4.050 | 6.567  | -1.645 | -0.656 |
| TFAP4   | 3.056 | 3.616  | -0.240 | 0.241  |
| TFDP1   | 6.924 | 8.627  | 6.414  | 4.172  |
| TFDP2   | 2.218 | 3.585  | -0.497 | -0.559 |
| THAP7   | 3.727 | 1.292  | -0.877 | -1.835 |
| TOP2A   | 8.939 | 10.126 | 6.888  | 4.756  |
| UHRF1   | 9.938 | 9.326  | 6.130  | 4.017  |
| WHSC1   | 8.589 | 7.152  | 4.670  | 2.999  |
| YBX1    | 6.092 | 6.491  | 2.652  | 2.485  |

|         |       |       |        |        |
|---------|-------|-------|--------|--------|
| YEATS4  | 6.043 | 8.922 | 3.776  | 1.309  |
| ZBED4   | 4.087 | 2.913 | -2.311 | -0.847 |
| ZC3HC1  | 3.289 | 2.379 | -2.882 | -2.686 |
| ZCCHC4  | 4.086 | 3.843 | 0.173  | 0.062  |
| ZCRB1   | 0.782 | 4.113 | 1.620  | -0.301 |
| ZDBF2   | 1.580 | 2.932 | 1.923  | 1.015  |
| ZDHHC16 | 4.238 | 4.345 | -0.287 | -1.737 |
| ZFPL1   | 3.992 | 2.256 | 0.266  | -1.976 |
| ZMAT5   | 3.073 | 2.474 | 2.787  | -0.095 |
| ZMYND19 | 6.231 | 3.468 | -3.816 | -3.495 |
| ZNF174  | 4.455 | 4.718 | -2.413 | -3.180 |
| ZNF207  | 6.071 | 6.775 | 0.949  | 2.146  |
| ZNF250  | 2.321 | 2.238 | 1.425  | 0.497  |
| ZNF259  | 3.954 | 3.774 | -5.315 | -5.148 |
| ZNF282  | 4.617 | 1.833 | 0.481  | -1.582 |
| ZNF326  | 2.248 | 3.761 | -3.014 | -1.342 |
| ZNF367  | 4.541 | 6.792 | 2.838  | 1.980  |
| ZNF511  | 2.662 | 2.844 | -1.308 | -2.913 |
| ZNF552  | 3.091 | 2.930 | -1.417 | -1.576 |
| ZNF576  | 3.832 | 3.012 | -2.835 | -2.514 |
| ZNF593  | 5.758 | 5.692 | -2.610 | -3.423 |
| ZNF653  | 4.467 | 2.150 | 0.926  | 0.096  |
| ZNF670  | 3.003 | 3.627 | -3.435 | -1.389 |
| ZNF747  | 2.505 | 3.142 | -0.561 | -1.823 |
| ZNHIT1  | 3.722 | 4.847 | 4.393  | 1.094  |
| ZNHIT3  | 1.735 | 3.778 | 3.575  | 0.996  |



**Table S3.** 64 TFs that were significantly associated (P-val < 0.05) with Principal Component 2 of SVD analysis. *Related to Figure 2.*

| <b>Name</b> | <b>Het4h</b> | <b>Het12h</b> | <b>Het48h</b> | <b>Het120h</b> |
|-------------|--------------|---------------|---------------|----------------|
| AKNA        | -2.825       | -6.503        | 3.724         | 2.997          |
| ALS2CR8     | -2.326       | 0.183         | 2.050         | 2.418          |
| ASH1L       | -4.155       | -3.424        | 1.498         | 3.693          |
| BAZ2B       | -2.148       | -2.705        | 4.588         | 5.026          |
| BCL11A      | -2.983       | -2.277        | 2.987         | 2.243          |
| CBFA2T2     | -1.138       | -3.141        | 2.202         | 2.715          |
| CBFA2T3     | 0.220        | -1.581        | 2.593         | 2.103          |
| CGGBP1      | -2.611       | 0.289         | 1.996         | 2.655          |
| CNOT8       | -3.093       | -0.733        | 4.056         | 4.675          |
| CREB1       | -4.687       | -2.142        | 1.573         | 2.923          |
| CREBZF      | -2.112       | -1.460        | 1.054         | 3.279          |
| DMTF1       | -2.816       | -2.914        | 3.015         | 3.585          |
| ELF1        | -2.012       | -0.312        | 1.495         | 3.683          |
| FLI1        | -2.634       | -0.762        | 3.686         | 3.128          |
| FOXP3       | -2.498       | -2.778        | 3.013         | 2.615          |
| FOXO1       | -0.955       | -0.864        | 2.850         | 2.852          |
| GATA1       | -3.216       | -3.715        | 2.861         | 1.394          |
| GTF2I       | 0.778        | 0.112         | 1.755         | 3.522          |
| HBP1        | -5.360       | -3.934        | 2.962         | 2.065          |
| HCLS1       | -1.455       | -2.715        | 5.913         | 3.405          |
| HDAC1       | 1.816        | 1.956         | 4.663         | 3.900          |
| IFI16       | -3.810       | -3.397        | 1.842         | 1.461          |
| IRF2        | -1.918       | -2.976        | 4.728         | 2.944          |
| IRF8        | -3.875       | -3.686        | 4.545         | 2.318          |
| IRF9        | -5.574       | -7.158        | 2.826         | 1.340          |
| KLF12       | -2.864       | -1.214        | 4.590         | 3.620          |
| LYL1        | -0.725       | -1.550        | 5.069         | 2.773          |
| MEF2C       | -2.820       | -0.276        | 3.604         | 3.567          |
| MSL3        | -3.131       | -1.231        | 2.765         | 2.200          |
| MYBL1       | 0.010        | 1.085         | 4.805         | 3.233          |
| NR2C2       | -4.493       | -3.318        | 0.579         | 2.528          |
| POU2F2      | -1.903       | -4.024        | 2.881         | 1.368          |
| RBL2        | -6.015       | -5.206        | 2.421         | 2.534          |
| RERE        | -0.358       | -3.939        | 2.291         | 3.288          |
| RFX5        | -2.632       | -2.376        | 3.778         | 2.704          |
| SP140       | -3.840       | -3.315        | 3.101         | 0.956          |
| SPI1        | 1.393        | -1.663        | 3.842         | 1.262          |
| SPIB        | 0.005        | -0.088        | 4.447         | 2.099          |

|         |        |        |       |       |
|---------|--------|--------|-------|-------|
| STAT2   | -1.082 | -2.467 | 4.916 | 3.165 |
| STAT5B  | -1.264 | -0.988 | 2.801 | 2.955 |
| STAT6   | -1.631 | -5.465 | 2.694 | 1.077 |
| TADA3   | 1.164  | 0.214  | 4.372 | 2.056 |
| TAF10   | -1.452 | -2.289 | 5.065 | 2.162 |
| TCEAL1  | -2.477 | -0.754 | 2.264 | 1.686 |
| TFEB    | -1.576 | -2.273 | 2.782 | 1.377 |
| ZBTB20  | -4.185 | -3.492 | 3.746 | 3.861 |
| ZC3H6   | -2.718 | -1.188 | 1.829 | 2.028 |
| ZCCHC11 | -3.312 | -3.614 | 2.095 | 2.060 |
| ZCCHC6  | -2.229 | -0.822 | 2.599 | 2.390 |
| ZDHHC17 | -3.765 | -3.623 | 0.806 | 3.139 |
| ZFC3H1  | -3.625 | -3.812 | 0.490 | 3.763 |
| ZFP161  | -2.205 | 0.608  | 3.708 | 3.302 |
| ZFP90   | -4.046 | -4.074 | 2.092 | 1.380 |
| ZFYVE21 | -0.369 | -0.867 | 2.805 | 1.681 |
| ZHX2    | -1.316 | -1.112 | 4.998 | 3.970 |
| ZMAT1   | -4.296 | -3.626 | 2.493 | 3.840 |
| ZMYM2   | -3.633 | -1.092 | 1.146 | 3.018 |
| ZNF292  | -3.893 | -2.265 | 1.987 | 2.974 |
| ZNF395  | 0.752  | -0.306 | 3.015 | 2.023 |
| ZNF512  | -0.888 | -2.147 | 1.529 | 3.258 |
| ZNF581  | 1.701  | 0.588  | 3.640 | 1.530 |
| ZNF611  | -2.437 | -2.978 | 1.940 | 2.693 |
| ZNF652  | -2.529 | -0.104 | 1.973 | 2.730 |
| ZNF763  | -2.319 | -2.089 | 2.378 | 1.490 |
| ZSWIM6  | -2.708 | -2.172 | 1.556 | 2.817 |

**Table S4.** MRs ranked by statistical significance. Genes in red font with white background used in the 8-factor cocktail. Genes in red font with yellow background used in the 5-factor cocktail. *Related to Figure 4.*

| Rank | Gene    | Het120h |             | Gene    | HSC     |          | Gene    | MPP     |          | Gene    | MLP     |          |
|------|---------|---------|-------------|---------|---------|----------|---------|---------|----------|---------|---------|----------|
|      |         | NES     | FDR         |         | NES     | FDR      |         | NES     | FDR      |         | NES     | FDR      |
| 1    | BAZ2B   | 5.02562 | 1.50E-05    | BAZ2B   | 4.24258 | 0.000461 | CNOT8   | 5.6119  | 9.19E-07 | BAZ2B   | 6.0133  | 1.05E-07 |
| 2    | CNOT8   | 4.67461 | 7.03E-05    | CNOT8   | 4.19081 | 0.000559 | ZDHHC17 | 5.00837 | 1.81E-05 | ZBTB20  | 5.90527 | 1.88E-07 |
| 3    | ZHX2    | 3.9697  | 0.001049506 | HBP1    | 4.11598 | 0.000747 | KLF12   | 4.19347 | 0.000554 | ASH1L   | 5.23584 | 6.22E-06 |
| 4    | ZBTB20  | 3.86105 | 0.001517053 | ZBTB20  | 3.85393 | 0.001884 | CREB1   | 4.09086 | 0.000818 | CNOT8   | 5.16886 | 8.65E-06 |
| 5    | ZMAT1   | 3.83977 | 0.001632292 | KLF12   | 3.58386 | 0.004582 | DMTF1   | 4.0104  | 0.001095 | CREB1   | 4.80127 | 4.71E-05 |
| 6    | ZFC3H1  | 3.76325 | 0.002099259 | DMTF1   | 3.18559 | 0.014848 | HBP1    | 3.87893 | 0.001726 | DMTF1   | 4.39867 | 0.000251 |
| 7    | ASH1L   | 3.69267 | 0.002618486 | ZDHHC17 | 3.02631 | 0.022934 | BAZ2B   | 3.71004 | 0.003054 | KLF12   | 4.32559 | 0.000335 |
| 8    | ELF1    | 3.68283 | 0.002689561 | ASH1L   | 3.01203 | 0.023839 | ZBTB20  | 3.55604 | 0.00496  | HBP1    | 4.21674 | 0.000509 |
| 9    | KLF12   | 3.62014 | 0.00330098  | ELF1    | 2.73989 | 0.04708  | ASH1L   | 3.54716 | 0.005103 | ZMAT1   | 4.13246 | 0.000704 |
| 10   | DMTF1   | 3.58468 | 0.003683325 | CREB1   | 2.62948 | 0.060037 | CREBZF  | 3.54655 | 0.005108 | HCLS1   | 3.95528 | 0.001335 |
| 11   | MEF2C   | 3.56698 | 0.003898188 | ZMAT1   | 2.55368 | 0.071013 | ZFC3H1  | 3.5215  | 0.005535 | CREBZF  | 3.95449 | 0.001337 |
| 12   | HCLS1   | 3.40531 | 0.006547864 | ZNF512  | 2.48523 | 0.083021 | ELF1    | 3.51595 | 0.005609 | ZHX2    | 3.73065 | 0.002853 |
| 13   | RERE    | 3.28813 | 0.009285318 | HCLS1   | 2.48457 | 0.083121 | ZNF512  | 2.96383 | 0.027129 | ELF1    | 3.69605 | 0.003213 |
| 14   | CREBZF  | 3.27927 | 0.009564171 | ZHX2    | 2.3553  | 0.109479 | ZMAT1   | 2.82563 | 0.03837  | ZDHHC17 | 3.65817 | 0.00359  |
| 15   | ZNF512  | 3.2576  | 0.010213069 | IRF2    | 2.35267 | 0.109808 | ZNF292  | 2.62743 | 0.060315 | IRF2    | 3.24122 | 0.012628 |
| 16   | STAT2   | 3.16453 | 0.013592443 | CREBZF  | 2.25786 | 0.132438 | IRF2    | 2.61643 | 0.061855 | FOXN3   | 3.16584 | 0.015669 |
| 17   | ZDHHC17 | 3.1391  | 0.01449553  | ZFC3H1  | 2.07549 | 0.183242 | ZMYM2   | 2.47409 | 0.08516  | ZMYM2   | 3.14054 | 0.016729 |
| 18   | FLI1    | 3.12843 | 0.014805925 | ZNF292  | 2.05693 | 0.190129 | ZHX2    | 2.37114 | 0.105274 | FLI1    | 3.13468 | 0.016998 |
| 19   | ZMYM2   | 3.01767 | 0.020021959 | STAT2   | 2.04817 | 0.192896 | FLI1    | 2.22344 | 0.141716 | MSL3    | 2.98771 | 0.02544  |
| 20   | ZNF292  | 2.97411 | 0.022281624 | MSL3    | 1.93049 | 0.23424  | MEF2C   | 2.13014 | 0.167618 | IRF8    | 2.9831  | 0.025757 |
| 21   | IRF2    | 2.94383 | 0.024163623 | ZMYM2   | 1.92281 | 0.236724 | IRF8    | 2.07561 | 0.183242 | STAT2   | 2.98122 | 0.025876 |
| 22   | CREB1   | 2.92263 | 0.025535747 | RERE    | 1.87354 | 0.255841 | RERE    | 1.96734 | 0.220294 | RERE    | 2.97198 | 0.026538 |
| 23   | FOXN3   | 2.61504 | 0.053207671 | MEF2C   | 1.78313 | 0.293293 | MSL3    | 1.88486 | 0.250913 | ZFC3H1  | 2.94799 | 0.028254 |
| 24   | IRF8    | 2.31811 | 0.102091602 | IRF8    | 1.77609 | 0.296536 | HCLS1   | 1.46311 | 0.449435 | ZNF512  | 2.90785 | 0.031122 |
| 25   | MSL3    | 2.20003 | 0.12811302  | FLI1    | 1.41279 | 0.476419 | STAT2   | 1.16474 | 0.607859 | MEF2C   | 2.87547 | 0.033744 |
| 26   | HBP1    | 2.06533 | 0.166044095 | FOXN3   | 1.2932  | 0.537395 | FOXN3   | 1.10859 | 0.634883 | ZNF292  | 2.83477 | 0.037473 |

**Table S5.** Genes that were identified as classifiers by the random forest model to distinguish HSCs, MPPs, MLPs and the committed progenitors. *Related to Figure 6.*

|    | <b>Gene</b> |    | <b>Gene</b> |
|----|-------------|----|-------------|
| 1  | CD74        | 24 | CD53        |
| 2  | HSPA5       | 25 | PNRC1       |
| 3  | DNTTIP2     | 26 | HHEX        |
| 4  | IRAK3       | 27 | RHOC        |
| 5  | PIK3IP1     | 28 | RBPM5       |
| 6  | XBP1        | 29 | PDZD8       |
| 7  | RIPK2       | 30 | STX3        |
| 8  | EEF1D       | 31 | LAIR1       |
| 9  | BIRC2       | 32 | UBB         |
| 10 | SELENOK     | 33 | FOS         |
| 11 | TMEM59      | 34 | MLLT3       |
| 12 | DUSP1       | 35 | DDIT3       |
| 13 | SOCS2       | 36 | TAF7        |
| 14 | FOSB        | 37 | HLA-DQB1    |
| 15 | ZFP36       | 38 | GATA2       |
| 16 | BST2        | 39 | MAFF        |
| 17 | JUND        | 40 | HLA-DRB1    |
| 18 | RNF138      | 41 | EVL         |
| 19 | LMO2        | 42 | SVIP        |
| 20 | ITM2B       | 43 | LRBA        |
| 21 | GYPC        | 44 | GPSM3       |
| 22 | APP         | 45 | VAMP2       |
| 23 | PRKACB      | 46 | HLA-DPB1    |

**Table S6.** RSAT clustering of enriched motifs with the average p-values of motif enrichment within each cluster. p-values for individual motif enrichment were first calculated using AME. RSAT was then used to cluster the motifs based on consensus sequences, and the average of individual p-values for motifs within each group were calculated. *Related to Figure 6.*

|                     | <b>Motif Clusters</b>                                                                                                                                                                                                                                 | <b>No of Motifs</b> | <b>p val</b> | <b>adj pval</b> |
|---------------------|-------------------------------------------------------------------------------------------------------------------------------------------------------------------------------------------------------------------------------------------------------|---------------------|--------------|-----------------|
| 1                   | JUN(var.2),BACH2,FOSL1,JUNB,JUND,FOSL1::JUNB,FOSL1::JUN,FOS::JUND,FOSL2::JUN,FOS::JUNB,JDP2,NFE2,FOS,BATF3,BATF,BATF::JUN,FOSL2,JUN::JUNB,FOSL1::JUND,FOS::JUN,FOSL2::JUND,FOSB::JUNB,FOSL2::JUNB,NFE2L2,MAF::NFE2,BACH1,MAFK,NFE2L1                  | 28                  | 1.21E-08     | 5.23E-05        |
| 2                   | LHX2,LHX6,HOXA6,MEOX2,MEOX1,EVX1,EVX2,GSX1,HOXB3,MNX1,EN2,LBX2,ESX1,MIXL1,ALX3,NKX6-3,HOXC8,HOXA1,HOXB5,NKX6-1,NKX6-2,HOXA4,HOXB4,HOXC4,HOXD4,VAX1,VAX2,GSX2,HOXB2,PDX1,LHX1,EN1,DRGX,SHOX,UNCX,RAX2,DLX6,MSX2,MSX1,BARX1,BSX,HOXB6,HOXA7,HOXB8,HOXD8 | 45                  | 2.20E-07     | 0.00148087      |
| 3                   | NFYB,NFYA,NFYC                                                                                                                                                                                                                                        | 3                   | 5.10E-07     | 0.00358         |
| 4                   | FOS::JUN(var.2),FOSL1::JUND(var.2),FOSB::JUNB(var.2),FOSL1::JUN(var.2),JUN::JUNB(var.2),FOSL2::JUN(var.2),FOSB::JUN                                                                                                                                   | 7                   | 4.71E-07     | 0.00227121      |
| 5                   | POU5F1B,POU3F4,POU2F1,POU1F1,POU3F3,POU3F2,POU3F1                                                                                                                                                                                                     | 7                   | 1.76E-07     | 0.000655467     |
| 6                   | ONECUT1,CUX1,CUX2                                                                                                                                                                                                                                     | 3                   | 2.87E-06     | 0.00530333      |
| 7                   | KLF5,KLF15,KLF3,KLF2,KLF6,KLF14,KLF10,KLF16,KLF11,SP3,SP8,SP9                                                                                                                                                                                         | 12                  | 1.37E-16     | 1.57E-12        |
| 8                   | MEIS2(var.2),PBX2,MEIS1(var.2)                                                                                                                                                                                                                        | 3                   | 3.10E-07     | 0.00192567      |
| 9                   | ATF4,CEBPG(var.2)                                                                                                                                                                                                                                     | 2                   | 3.01E-11     | 1.29E-07        |
| 10                  | CEBPA,HLF,NFIL3                                                                                                                                                                                                                                       | 3                   | 1.57E-07     | 0.000993667     |
| 11                  | KLF4,MAZ,ZNF148                                                                                                                                                                                                                                       | 3                   | 2.51E-07     | 0.0022833       |
| 12                  | GATA1,GATA6,GATA2,GATA4,GATA3,GATA5                                                                                                                                                                                                                   | 6                   | 1.72E-21     | 1.87E-17        |
| 13                  | EGR2,EGR3,EGR1                                                                                                                                                                                                                                        | 3                   | 3.78E-07     | 0.00108122      |
| 14                  | SP2,SP4,SP1                                                                                                                                                                                                                                           | 3                   | 5.37E-14     | 2.23E-10        |
| 15                  | POU4F3,POU4F1                                                                                                                                                                                                                                         | 2                   | 1.34E-07     | 0.000576595     |
| 16                  | DMRTA2,DMRT3                                                                                                                                                                                                                                          | 2                   | 7.19E-07     | 0.00641905      |
| 17                  | GSC2,DPRX                                                                                                                                                                                                                                             | 2                   | 4.35E-08     | 0.0004275       |
| 18                  | PHOX2B,PHOX2A,DUXA                                                                                                                                                                                                                                    | 3                   | 4.96E-13     | 2.12E-09        |
| 19                  | KLF9                                                                                                                                                                                                                                                  | 1                   | 1.91E-07     | 0.00233         |
| 20                  | CEBPE,DBP                                                                                                                                                                                                                                             | 2                   | 4.96E-06     | 0.010275        |
| 21                  | POU6F1(var.2)                                                                                                                                                                                                                                         | 1                   | 3.40E-09     | 2.64E-05        |
| 22                  | FOXB1                                                                                                                                                                                                                                                 | 1                   | 4.13E-09     | 2.99E-05        |
| 23                  | ZBTB14                                                                                                                                                                                                                                                | 1                   | 1.42E-12     | 1.20E-08        |
| 24                  | CTCF,CTCFL                                                                                                                                                                                                                                            | 2                   | 1.89E-11     | 2.58E-07        |
| 25                  | BARX2                                                                                                                                                                                                                                                 | 1                   | 3.50E-10     | 2.93E-06        |
| 26                  | NRF1                                                                                                                                                                                                                                                  | 1                   | 3.24E-21     | 1.54E-17        |
| 27                  | NKX3-1                                                                                                                                                                                                                                                | 1                   | 2.57E-08     | 0.000123        |
| 28                  | MITF,TFE3                                                                                                                                                                                                                                             | 2                   | 1.12E-06     | 0.005905        |
| 29                  | HOXA9                                                                                                                                                                                                                                                 | 1                   | 2.42E-06     | 0.0143          |
| 30                  | GATA1::TAL1                                                                                                                                                                                                                                           | 1                   | 1.73E-10     | 5.37E-07        |
| Total No. of Motifs |                                                                                                                                                                                                                                                       | 152                 |              |                 |

**Table S7.** VIPER predicted activities for TFs with enriched binding motifs in BAZ2B induced nucleosome-free regions. TF activities with low statistical significance are marked in red. *Related to Figure 6.*

|    | Gene   | Average VIPER activity | p.val       |
|----|--------|------------------------|-------------|
| 1  | MEIS1  | 4.165717478            | <2.23e-308  |
| 2  | HOXB2  | 2.824254346            | <2.23e-308  |
| 3  | KLF10  | 2.611233037            | <2.23e-308  |
| 4  | GATA2  | 2.231472878            | <2.23e-308  |
| 5  | KLF6   | 1.947992437            | <2.23e-308  |
| 6  | JUN    | 1.838219735            | <2.23e-308  |
| 7  | GATA3  | 1.802026924            | <2.23e-308  |
| 8  | ATF4   | 1.656327626            | <2.23e-308  |
| 9  | FOSB   | 1.46695911             | <2.23e-308  |
| 10 | HOXA9  | 1.300555709            | <2.23e-308  |
| 11 | FOS    | 1.235620929            | <2.23e-308  |
| 12 | JUNB   | 1.085880464            | <2.23e-308  |
| 13 | JUND   | 1.058128589            | <2.23e-308  |
| 14 | EGR2   | 3.062017975            | 4.82E-248   |
| 15 | HOXA1  | 3.075411193            | 4.63E-247   |
| 16 | KLF2   | 1.28735717             | 1.16E-232   |
| 17 | KLF4   | 1.100806785            | 1.25E-218   |
| 18 | HLF    | 0.744134719            | 5.03E-215   |
| 19 | CUX1   | 0.466408185            | 3.70E-202   |
| 20 | EGR1   | 0.905845912            | 1.26E-185   |
| 21 | KLF5   | 0.74390973             | 2.29E-143   |
| 22 | BACH2  | 0.303543334            | 2.81E-123   |
| 23 | TAL1   | 0.284711423            | 1.02E-120   |
| 24 | BATF   | 0.2910327              | 7.43E-114   |
| 25 | NRF1   | 0.413293005            | 4.74E-106   |
| 26 | CEBPA  | -0.089865163           | 3.77E-100   |
| 27 | TFE3   | 0.590631286            | 5.54E-100   |
| 28 | NFIL3  | 0.257470563            | 5.27E-87    |
| 29 | FOSL1  | 0.824222327            | 9.80E-86    |
| 30 | HOXB3  | 0.255682528            | 1.07E-84    |
| 31 | KLF3   | 0.082421261            | 2.64E-52    |
| 32 | HOXB5  | 0.15557354             | 6.16E-52    |
| 33 | KLF9   | 0.160851708            | 3.96E-50    |
| 34 | HOXA6  | 0.33992665             | 2.93E-47    |
| 35 | KLF11  | 0.230972851            | 7.16E-43    |
| 36 | HOXB4  | 0.465682352            | 4.97E-37    |
| 37 | HOXA7  | 0.063953445            | 1.80E-36    |
| 38 | POU2F1 | 0.217705195            | 3.39E-31    |
| 39 | HOXA4  | 0.097971819            | 1.77E-28    |
| 40 | MAFK   | 0.154196678            | 1.10E-25    |
| 41 | ZNF148 | 0.026730097            | 4.06E-18    |
| 42 | KLF16  | 0.00495424             | 1.05E-17    |
| 43 | CEBPG  | 0.022724506            | 2.46E-16    |
| 44 | SP1    | -0.108364718           | 5.20E-15    |
| 45 | FOSL2  | 0.029001083            | 5.43E-08    |
| 46 | DBP    | -0.116160488           | 1.20E-06    |
| 47 | PBX2   | -0.166428132           | 9.43E-06    |
| 48 | NFE2L1 | -0.101142318           | 0.004423076 |
| 49 | NFYB   | -0.13381193            | 0.800102118 |
| 50 | NFE2   | -0.244520637           | 0.994630511 |
| 51 | NFE2L2 | -0.02996747            | 0.997284523 |
| 52 | SP3    | -0.103008973           | 0.999631991 |
| 53 | CTCF   | -0.133484911           | 0.999958385 |
| 54 | NFYC   | -0.018464373           | 0.999999953 |
| 55 | SP2    | -0.173251666           | 1           |
| 56 | MAZ    | -0.541410864           | 1           |
| 57 | GATA1  | -1.923387595           | 1           |
